# Supplementary material for: Transcriptomic profiling of microglia reveals signatures of cell activation and immune response, during experimental cerebral malaria
Source: PubMed Central journal article supplement (PMC5171943; doi:10.1038/srep39258), 2016-12-19
Supplement: srep39258-s1.pdf [file srep39258-s1.pdf]

**Transcriptomic profiling of microglia reveals signatures of cell activation and immune response, during experimental cerebral malaria.**

Barbara Capuccini<sup>1,\*</sup>, Jingwen Lin<sup>1</sup>, Carlos Talavera-López<sup>1</sup>, Shahid M. Khan<sup>2</sup>, Jan Sodenkamp<sup>1</sup>, Roberta Spaccapelo<sup>3</sup>, and Jean Langhorne<sup>1,\*</sup>

1) The Francis Crick Institute, London NW1 1AT, UK

2) Leiden University Medical Center, Albinusdreef 2, 2333 ZA, Leiden, Netherlands

3) Department of Experimental Medicine, University of Perugia, 06132 Perugia, Italy

\*Corresponding authors: Barbara Capuccini and Jean Langhorne, The Francis Crick institute, Midland Road, London NW1 1AT, [barbara.capuccini@crick.ac.uk](mailto:barbara.capuccini@crick.ac.uk) and [jean.langhorne@crick.ac.uk](mailto:jean.langhorne@crick.ac.uk), Tel: [+442037961498](tel:+442037961498) **Supplementary table S1: Differentially expressed genes at d5.**

| Entrez Gene ID | ProbeID | Gene symbol   | Fold change vs naïve |
|----------------|---------|---------------|----------------------|
| 231655         | 4780253 | Oasl1         | 562.69806            |
|                | 2810612 | Birc5         | 391.27356            |
| 71988          | 7050768 | Esco2         | 382.88635            |
| 70218          | 2680010 | 3000004C01Rik | 354.85516            |
| 16571          | 6660050 | Kif4          | 287.88898            |
| 70218          | 1710368 | 3000004C01Rik | 275.62695            |
|                | 4730246 | LOC226690     | 244.59027            |
|                | 2190164 | Ccnb1         | 236.2867             |
| 246728         | 3060450 | Oas2          | 232.05135            |
|                | 7100301 | 2810417H13Rik | 219.29144            |
| 218977         | 4900215 | Dlg7          | 198.97905            |
| 66442          | 2000270 | Spc25         | 187.67982            |
| 269582         | 6980315 | Clspn         | 181.98192            |
|                | 2630066 | Ckap2         | 175.79112            |
|                | 7400215 | Birc5         | 169.69556            |
| 70024          | 4220326 | Mcm10         | 169.05167            |
| 16551          | 2360189 | Kif11         | 165.70898            |
|                | 5360129 | Mki67         | 165.63124            |
|                | 3140707 | Tpx2          | 161.57355            |
| 18175          | 3170047 | Nrap          | 160.49538            |
| 231655         | 240187  | Oasl1         | 159.16177            |
| 237911         | 2070242 | Brip1         | 151.91162            |
| 54141          | 2190064 | Spag5         | 145.91838            |
| 14793          | 4920148 | Cdca3         | 140.77196            |
| 71819          | 4850079 | Kif23         | 140.17279            |
|                | 380661  | 5730547N13Rik | 139.85246            |
|                | 1770349 | Zfp276        | 131.78625            |
|                | 4780360 | Troap         | 127.040886           |
|                | 7040475 | 2610019I03Rik | 121.077415           |
|                | 1580632 | 4921511I23Rik | 118.213234           |
| 623474         | 610039  | E130016E03Rik | 116.6728             |
| 18973          | 4060441 | Pole          | 116.4709             |
|                | 1240446 | Birc5         | 111.2811             |
| 217653         | 3850358 | C79407        | 109.226364           |
| 23962          | 7050014 | Oasl2         | 108.35412            |
| 20419          | 4280047 | Shcbp1        | 104.15031            |
|                | 1500446 | Cdca8         | 102.97447            |
|                | 6020722 | Ccne2         | 102.247444           |
| 102920         | 6110646 | Cenpi         | 101.91403            |
| 12449          | 4890292 | Ccnf          | 101.12314            |
|                | 4570458 | Sn            | 99.43179             |
|                | 3440725 | Rrm2          | 93.56047             |
| 228421         | 3180164 | Kif18a        | 92.33604             |
| 60411          | 4860600 | Solt          | 92.18272             |

|        |         |                  |           |
|--------|---------|------------------|-----------|
|        | 3830017 | 5730547N13Rik    | 90.80971  |
| 67052  | 3390273 | Ndc80            | 90.34923  |
| 17279  | 2650347 | Melk             | 89.59565  |
|        | 6130095 | C030025P15Rik    | 82.70166  |
|        | 3830328 | Cdc25c           | 81.812965 |
| 19361  | 6480739 | Rad51            | 79.30189  |
|        | 4570440 | 2610019I03Rik    | 79.13615  |
| 27221  | 2030068 | Chaf1a           | 78.98265  |
|        | 1410070 | Kntc1            | 78.83032  |
| 52033  | 2900300 | Pbk              | 76.3822   |
|        | 4780193 | Calmbp1          | 76.21254  |
| 269582 | 2600019 | Clspn            | 75.77537  |
|        | 1050092 | Serpina3g        | 75.30847  |
|        | 5310209 | 2610021K21Rik    | 73.70003  |
| 67196  | 3190403 | 2700084L22Rik    | 73.50177  |
|        | 1740554 | scl0002624.1_576 | 70.703896 |
| 21973  | 4250403 | Top2a            | 70.525604 |
|        | 6590653 | Irf7             | 69.78389  |
|        | 4850324 | 1190002F15Rik    | 68.70011  |
| 74107  | 3710050 | 1200008O12Rik    | 67.92994  |
|        | 60368   | Slp              | 67.928276 |
|        | 130348  | Slp              | 66.872345 |
| 68713  | 4010019 | Ifitm1           | 66.182945 |
|        | 6420170 | BC006779         | 64.16627  |
|        | 430202  | Top2a            | 63.499474 |
|        | 4120452 | 2610019I03Rik    | 62.014538 |
|        | 6370082 | Rad51ap1         | 61.223118 |
| 17279  | 2140156 | Melk             | 60.908543 |
|        | 10161   | Depdc1b          | 59.47352  |
|        | 5360195 | Sgol2            | 59.079838 |
| 70024  | 650121  | Mcm10            | 58.730095 |
| 19361  | 110520  | Rad51            | 57.845093 |
| 51944  | 5820193 | D2Ertd750e       | 56.591263 |
| 269582 | 7570278 | Clspn            | 55.945942 |
| 219114 | 4830687 | F630043A04Rik    | 55.087727 |
|        | 5290736 | Kifc5a           | 54.96754  |
| 110033 | 4210246 | Kif22            | 54.83493  |
| 231507 | 5860243 | Plac8            | 53.18062  |
|        | 6450259 | Ifi205           | 52.384415 |
| 268930 | 7160689 | Pkmyt1           | 52.240856 |
| 68743  | 1190201 | Anln             | 51.89771  |
|        | 1740491 | 2310007D09Rik    | 50.564243 |
|        | 5420709 | Rad51ap1         | 50.12598  |
| 233406 | 780475  | Prc1             | 49.949154 |
|        | 5490767 | 2500002A22Rik    | 49.44505  |
|        | 6450634 | 1110017L21Rik    | 49.1867   |
| 229003 | 450706  | BC006779         | 49.0742   |
| 11982  | 270180  | Atp10a           | 48.936394 |

|        |         |               |           |
|--------|---------|---------------|-----------|
| 18824  | 1740379 | Plp2          | 48.85782  |
|        | 2190133 | Ifi205        | 48.79241  |
|        | 2650703 | 9830002L24Rik | 48.718544 |
| 108912 | 1820274 | Cdca2         | 48.689503 |
|        | 2370168 | Fanca         | 48.3662   |
| 66442  | 6620184 | Spc25         | 48.29786  |
| 29870  | 1500148 | Gtse1         | 48.097076 |
| 21877  | 7400142 | Tk1           | 47.839474 |
|        | 2350470 | 2610021K21Rik | 47.53063  |
| 67629  | 4810047 | Spc24         | 46.570045 |
|        | 3840523 | Kif23         | 46.217655 |
|        | 5490181 | 4930547N16Rik | 46.214584 |
|        | 2760609 | Bard1         | 46.09576  |
| 114564 | 6520392 | Csprs         | 45.12898  |
|        | 3840356 | Rad51c        | 44.356777 |
| 231655 | 840259  | Oasl1         | 44.3155   |
| 268930 | 3190343 | Pkmyt1        | 44.282158 |
|        | 4390170 | Recql4        | 43.892036 |
| 14962  | 5260541 | H2-Bf         | 43.567055 |
| 319148 | 4860209 | Hist1h3c      | 43.183517 |
|        | 540647  | Cd69          | 42.887672 |
| 14793  | 1050170 | Cdca3         | 42.579636 |
|        | 380520  | Stk6          | 41.99132  |
|        | 4570689 | Cit           | 41.43934  |
|        | 580470  | Tnfrsf5       | 40.83884  |
| 16571  | 1770168 | Kif4          | 40.836857 |
| 12268  | 6510113 | C4            | 40.38639  |
| 70385  | 2650521 | 2600001J17Rik | 40.368267 |
|        | 2630427 | BC004701      | 40.12347  |
| 435565 | 6770259 | LOC435565     | 38.63581  |
| 12268  | 7510243 | C4            | 36.28671  |
| 12544  | 3400754 | Cdc45l        | 35.295895 |
|        | 2850717 | H2-Q8         | 34.93239  |
| 20555  | 3520746 | Slfn1         | 34.845673 |
| 66949  | 5220056 | Trim59        | 34.064667 |
| 12531  | 2470360 | Cdc25b        | 32.6228   |
| 17427  | 6280088 | Mns1          | 32.589252 |
|        | 540438  | LOC328752     | 31.44799  |
|        | 430333  | 5830426I05Rik | 31.378687 |
| 18140  | 4560397 | Uhrf1         | 31.308594 |
|        | 6290390 | Aurkb         | 31.226847 |
|        | 130437  | Mxd3          | 31.185476 |
| 21822  | 3890121 | Tgtp          | 30.966557 |
| 21853  | 160703  | Timeless      | 30.176195 |
|        | 6980397 | Kifc1         | 30.06568  |
| 68713  | 5960577 | Ifitm1        | 30.048313 |
|        | 3170487 | F730004D16Rik | 29.878084 |
| 23960  | 130598  | Oas1g         | 29.21682  |

|        |         |               |           |
|--------|---------|---------------|-----------|
|        | 2350095 | Bub1b         | 29.011826 |
| 15951  | 7550093 | Ifi204        | 28.723595 |
|        | 3780474 | 9930016I07Rik | 27.954042 |
|        | 7400528 | Ifi205        | 27.713778 |
| 15019  | 2750128 | H2-Q8         | 26.31227  |
|        | 1240538 | P2ry14        | 26.307    |
| 217653 | 4640673 | C79407        | 26.039589 |
| 100535 | 3120068 | Oas1d         | 25.94827  |
| 23960  | 3890551 | Oas1g         | 25.930876 |
| 106795 | 6330725 | Tcf19         | 25.89013  |
| 72155  | 1690360 | 2610510J17Rik | 25.737501 |
| 58185  | 5560474 | 2510004L01Rik | 25.694077 |
| 70466  | 2450270 | 2610318C08Rik | 25.592438 |
| 19366  | 7560373 | Rad54l        | 25.512104 |
|        | 4810184 | Dlm1-pending  | 25.50052  |
| 107995 | 4610722 | Cdc20         | 25.491926 |
| 24110  | 4610139 | Usp18         | 25.02767  |
| 107995 | 4390228 | Cdc20         | 24.927809 |
| 20684  | 1170110 | Sp100         | 24.784704 |
|        | 2320678 | Cdc25c        | 24.63742  |
| 21877  | 3450010 | Tk1           | 24.16144  |
|        | 5820128 | 0610037M15Rik | 24.160961 |
| 12534  | 6060379 | Cdc2a         | 23.444088 |
| 15959  | 3460504 | Ifit3         | 23.40348  |
|        | 1990270 | 2610318C08Rik | 22.509403 |
|        | 520427  | Plk1          | 22.199394 |
|        | 2030026 | Cdc6          | 21.908087 |
|        | 3840575 | Cd244         | 21.627584 |
|        | 3890292 | D630022O22Rik | 21.210865 |
| 58203  | 1580634 | Zbp1          | 20.905413 |
| 219131 | 1340193 | Phf11         | 20.780283 |
| 23962  | 4830010 | Oasl2         | 20.314072 |
| 15958  | 5270398 | Ifit2         | 19.826252 |
|        | 4830543 | 2310061N23Rik | 19.707273 |
| 17279  | 4210671 | Melk          | 19.63269  |
| 219131 | 6660327 | Phf11         | 19.614595 |
| 23960  | 3890328 | Oas1g         | 19.51171  |
|        | 160041  | Mmp25         | 19.162018 |
| 14469  | 6860600 | Gbp2          | 18.953106 |
|        | 1090382 | Cdkn3         | 18.884884 |
|        | 1410554 | Tyki          | 18.880236 |
|        | 3890682 | 2610036L11Rik | 18.792707 |
| 109242 | 1340010 | Kif24         | 18.72656  |
| 60530  | 670500  | Figl1         | 18.591211 |
|        | 2940192 | E130301L11Rik | 18.377993 |
|        | 2470730 | 2810417K24Rik | 18.245657 |
|        | 6580041 | Ifi205        | 18.057266 |
|        | 2900138 | Mphosph1      | 17.879044 |

|        |         |               |            |
|--------|---------|---------------|------------|
|        | 3360253 | Rad51c        | 17.66107   |
|        | 4830386 | Diap3         | 17.531418  |
| 102084 | 520040  | Al451557      | 17.500185  |
| 16647  | 7210291 | Kpna2         | 17.431828  |
| 110454 | 1690187 | Ly6a          | 17.34583   |
| 66141  | 3840292 | Ifitm3        | 17.21303   |
| 24110  | 2490452 | Usp18         | 16.801826  |
| 12263  | 4210470 | C2            | 16.723026  |
|        | 2710703 | E130306D19Rik | 16.599558  |
|        | 1190739 | A630055A13Rik | 16.511133  |
| 73804  | 1780543 | Kif2c         | 16.318998  |
| 68298  | 4480070 | Ncapd2        | 16.313654  |
| 53606  | 460221  | G1p2          | 16.0889    |
| 72155  | 7650195 | 2610510J17Rik | 15.747956  |
|        | 2490653 | LOC240327     | 15.672491  |
|        | 6580379 | P2ry14        | 15.054558  |
| 13555  | 60369   | E2f1          | 14.726257  |
|        | 10598   | Cxcl9         | 14.709968  |
| 74747  | 130634  | Ddit4         | 14.460221  |
| 68283  | 3360131 | 9530077C05Rik | 14.176626  |
| 14190  | 2340242 | Fgl2          | 14.135186  |
|        | 5820709 | LOC240921     | 14.129     |
|        | 1090215 | Sap18         | 14.08261   |
| 67775  | 2760577 | Rtp4          | 14.017168  |
| 21939  | 4760241 | Cd40          | 13.926463  |
|        | 5960097 | 1700113I22Rik | 13.857943  |
| 238673 | 2940632 | Zfp367        | 13.7803    |
| 15945  | 3140209 | Cxcl10        | 13.415448  |
| 15959  | 7510020 | Ifit3         | 13.391039  |
|        | 6020487 | Cyp4f18       | 13.3548155 |
| 110749 | 7200270 | Chaf1b        | 12.672548  |
| 432879 | 7330152 | LOC432879     | 12.548698  |
| 24110  | 1580528 | Usp18         | 12.35745   |
| 70218  | 6350367 | 3000004C01Rik | 12.354938  |
|        | 1090647 | 9830148G24Rik | 12.350932  |
| 29856  | 620202  | Smtn          | 12.306075  |
|        | 6860196 | 1700021E15Rik | 12.304326  |
| 243963 | 1440450 | Zfp473        | 12.255787  |
| 208084 | 6940411 | Al449441      | 11.957833  |
| 16881  | 4050711 | Lig1          | 11.731945  |
|        | 7200519 | Cenpa         | 11.665831  |
| 240084 | 3180039 | Cchcr1        | 11.664718  |
| 214901 | 1260022 | Chtf18        | 11.655519  |
| 12236  | 5910528 | Bub1b         | 11.510143  |
|        | 1580356 | Foxm1         | 11.308377  |
| 217946 | 4220139 | BC006933      | 11.209746  |
|        | 3890376 | 2610305J24Rik | 11.047728  |
| 59027  | 2750189 | Pbef1         | 11.006387  |

|        |         |               |            |
|--------|---------|---------------|------------|
|        | 6180504 | C030025P15Rik | 10.630138  |
| 211651 | 1940020 | Fancd2        | 10.614785  |
| 15958  | 360041  | Ifit2         | 10.603745  |
|        | 1400220 | LOC215405     | 10.409838  |
|        | 5130059 | Ifitm6        | 10.409609  |
|        | 3940242 | AA175286      | 10.3711815 |
| 14469  | 1400041 | Gbp2          | 10.120155  |
| 67849  | 3310196 | Cdca5         | 9.812839   |
| 329207 | 1500327 | Gm817         | 9.693724   |
|        | 380068  | 4732496O19Rik | 9.680233   |
|        | 2190215 | Cxcl10        | 9.642974   |
|        | 110259  | Cdc7          | 9.626499   |
| 15270  | 1090327 | H2afx         | 9.472496   |
|        | 5900075 | 5730588I11Rik | 9.457416   |
| 66336  | 20608   | Cenpp         | 9.309379   |
|        | 6450598 | D11Lgp2e      | 9.280994   |
|        | 3610528 | LOC331239     | 9.274826   |
| 15953  | 1090139 | Ifi47         | 9.20182    |
| 17216  | 1770612 | Mcm2          | 9.0858     |
| 18610  | 3610332 | Pdyn          | 9.01192    |
|        | 4040095 | H2-Q6         | 8.962184   |
|        | 5720397 | D11Lgp2e      | 8.9583645  |
|        | 290575  | Impa2         | 8.522373   |
| 17219  | 270379  | Mcm6          | 8.392076   |
| 630499 | 4640348 | EG630499      | 8.33847    |
|        | 6350114 | Ube2l6        | 8.326761   |
|        | 3290292 | Mx1           | 8.17586    |
|        | 2650754 | Ube2l6        | 8.080873   |
| 14056  | 1300035 | Ezh2          | 8.024011   |
| 20847  | 6220594 | Stat2         | 7.8547964  |
|        | 6280221 | Sp100         | 7.812571   |
| 16319  | 630634  | Incenp        | 7.791611   |
| 625360 | 5670156 | LOC625360     | 7.7538133  |
|        | 4290739 | Plekhk1       | 7.7275677  |
| 22137  | 5270544 | Ttk           | 7.668121   |
| 80861  | 6330592 | D11Lgp2e      | 7.667838   |
| 231832 | 3780113 | BC019731      | 7.570831   |
| 80876  | 840349  | Ifitm2        | 7.52459    |
|        | 2480709 | Foxm1         | 7.499896   |
|        | 7150431 | LOC237877     | 7.3081303  |
| 74016  | 4730131 | Phf19         | 7.04683    |
| 19200  | 2360554 | Pstpip1       | 6.9695625  |
| 77744  | 1340056 | 6720463M24Rik | 6.692515   |
|        | 4850689 | A130019H11Rik | 6.678477   |
|        | 6280176 | Mcm7          | 6.6618786  |
| 66140  | 990301  | 1110001A07Rik | 6.6533284  |
|        | 6220270 | Mcm5          | 6.6288705  |
| 227659 | 7400286 | Slc2a6        | 6.5806074  |

|        |         |               |           |
|--------|---------|---------------|-----------|
| 667977 | 270367  | H2-gs17       | 6.543152  |
|        | 1580309 | Hap1          | 6.523125  |
|        | 5560176 | 4930422G04Rik | 6.476602  |
|        | 5490386 | D230036F23Rik | 6.427278  |
|        | 1110445 | LOC380706     | 6.3832564 |
|        | 7610129 | 8430438L13Rik | 6.3544836 |
|        | 7510408 | Adora1        | 6.347123  |
| 12517  | 5700528 | Cd72          | 6.3380733 |
|        | 6290592 | LOC226691     | 6.188622  |
| 19340  | 1470278 | Rab3d         | 6.13619   |
| 56150  | 1410189 | Mad2l1        | 6.081124  |
| 107995 | 1570754 | Cdc20         | 6.0072384 |
|        | 4290487 | Mad2l1        | 6.0051785 |
|        | 6760762 | Sdc3          | 5.9295683 |
| 17219  | 3290437 | Mcm6          | 5.9200473 |
|        | 520278  | Mx2           | 5.8848405 |
| 20556  | 4120307 | Slfn2         | 5.795018  |
| 103737 | 2060730 | Pex12         | 5.7301335 |
| 219132 | 2810040 | D14Ertd668e   | 5.615501  |
| 16881  | 3060767 | Lig1          | 5.5961924 |
| 16906  | 840673  | Lmnb1         | 5.5866737 |
|        | 4260528 | Stat1         | 5.550217  |
| 56628  | 1710768 | LOC56628      | 5.4894485 |
| 15024  | 870446  | H2-T10        | 5.4878087 |
|        | 510402  | 4833427B12Rik | 5.4096622 |
|        | 2230538 | Cd44          | 5.3524323 |
| 12257  | 4670544 | Tspo          | 5.3130355 |
| 97165  | 5290279 | Hmgb2         | 5.297658  |
|        | 7160133 | Gas2l3        | 5.2026615 |
|        | 830537  | LOC269515     | 5.1953917 |
| 20133  | 6400348 | Rrm1          | 5.139351  |
|        | 3840279 | 4833427B12Rik | 5.090257  |
|        | 5960386 | 2810453L12Rik | 5.0766726 |
|        | 1780338 | 4833427B12Rik | 4.985267  |
| 50878  | 160753  | Stag3         | 4.9684772 |
| 22172  | 3830735 | Tyms-ps       | 4.8521776 |
| 244183 | 4230500 | A530023O14Rik | 4.8214192 |
| 12257  | 2760544 | Tspo          | 4.79256   |
|        | 4010097 | Map4k1        | 4.7830772 |
|        | 6280521 | A530060O05Rik | 4.7688146 |
| 22171  | 2100026 | Tyms          | 4.761206  |
|        | 3940458 | Rfc4          | 4.760301  |
|        | 2320575 | Mcm7          | 4.750655  |
| 12268  | 1010632 | C4            | 4.703818  |
| 246256 | 830632  | Fcrl3         | 4.702372  |
| 54563  | 1230703 | Nup210        | 4.6882267 |
|        | 6250600 | Cdkn2d        | 4.655705  |
| 547343 | 1400132 | LOC547343     | 4.654432  |



|        |         |                 |           |
|--------|---------|-----------------|-----------|
| 69550  | 2100139 | Bst2            | 4.651943  |
| 12575  | 2070377 | Cdkn1a          | 4.6513176 |
|        | 4570669 | 2810475A17Rik   | 4.6471457 |
| 21354  | 5870093 | Tap1            | 4.6280155 |
|        | 1470605 | D11ErtD759e     | 4.6154475 |
|        | 70546   | Hist1h2ag       | 4.582562  |
| 14972  | 6280026 | H2-K1           | 4.570758  |
| 15944  | 5820608 | Irgm            | 4.567409  |
| 13007  | 4780066 | Csrp1           | 4.5516977 |
| 233876 | 5890600 | C86302          | 4.533172  |
| 219132 | 520053  | D14ErtD668e     | 4.492915  |
|        | 7510768 | Alms1           | 4.480006  |
|        | 6100735 | Lmnb2           | 4.439131  |
| 27280  | 1980021 | Phlda3          | 4.345725  |
|        | 160463  | Lgals3bp        | 4.325593  |
| 22021  | 2120463 | Tpst1           | 4.3107605 |
| 217430 | 5890523 | Pqlc3           | 4.280392  |
|        | 2510333 | Ccl12           | 4.254782  |
| 12257  | 6270709 | Tspo            | 4.228617  |
| 12575  | 7040491 | Cdkn1a          | 4.1080008 |
| 19183  | 2900368 | Psmc3ip         | 4.105546  |
| 27214  | 3930176 | Dbf4            | 4.102268  |
|        | 240725  | Stat1           | 4.096473  |
|        | 6590215 | H2-T22          | 4.0960793 |
|        | 2760368 | 4930524J08Rik   | 4.0581093 |
| 404710 | 5270717 | Iqgap3          | 3.9945486 |
|        | 3140731 | Zranb3          | 3.9805925 |
| 19106  | 830762  | Prkr            | 3.9803104 |
|        | 1740427 | Pml             | 3.967862  |
|        | 5700019 | Dscr1           | 3.964518  |
| 67037  | 3520162 | Pmf1            | 3.9035442 |
|        | 3460037 | Fen1            | 3.8857737 |
| 15018  | 6940386 | H2-Q7           | 3.8829565 |
| 66910  | 6550768 | 1110004B13Rik   | 3.8824103 |
|        | 6220634 | 2810418N01Rik   | 3.8711207 |
| 22171  | 4810239 | Tyms            | 3.8473623 |
|        | 1710377 | scl0002449.1_77 | 3.8451912 |
| 94094  | 610184  | Trim34          | 3.8375728 |
|        | 2320181 | A330042I21Rik   | 3.8157623 |
|        | 2650326 | Pml             | 3.7510505 |
|        | 6100286 | scl0003903.1_2  | 3.7509995 |
| 12144  | 5960189 | Blm             | 3.702935  |
|        | 4040471 | Skp2            | 3.7000594 |
| 242705 | 770162  | E2f2            | 3.6865408 |
|        | 7400612 | Gcat            | 3.6840715 |
|        | 430358  | BC022145        | 3.6496854 |
|        | 3990246 | Ahcy            | 3.6341739 |
|        | 2600671 | BC066140        | 3.6304922 |

|        |         |               |           |
|--------|---------|---------------|-----------|
| 320148 | 2630433 | B430306N03Rik | 3.6288428 |
| 15013  | 5720048 | H2-Q2         | 3.6151996 |
| 56417  | 3610730 | Adar          | 3.6127155 |
| 21917  | 5390494 | Tmpo          | 3.6026416 |
| 26362  | 7100577 | Axl           | 3.6006958 |
| 78833  | 50446   | 2700085M18Rik | 3.58313   |
| 94094  | 4290128 | Trim34        | 3.5758214 |
| 242705 | 6550164 | E2f2          | 3.5640287 |
|        | 6100113 | Hist1h2ab     | 3.5487769 |
|        | 5390088 | LOC327957     | 3.5443697 |
| 17219  | 3990243 | Mcm6          | 3.5258489 |
|        | 3140446 | 2310020F24Rik | 3.5075839 |
| 110956 | 3170494 | D17H6S56E-5   | 3.5060594 |
|        | 50059   | AI504432      | 3.5028028 |
| 12580  | 7150528 | Cdkn2c        | 3.4952357 |
|        | 5270475 | Trex1         | 3.4327192 |
| 12419  | 3890519 | Cbx5          | 3.4222398 |
|        | 3440538 | Comp          | 3.4183524 |
|        | 4850669 | Blm           | 3.4174294 |
|        | 6100494 | 2610300B10Rik | 3.3983343 |
| 547253 | 2970521 | Parp14        | 3.3897967 |
| 327957 | 1190477 | A430084P05Rik | 3.3726218 |
| 12575  | 3130630 | Cdkn1a        | 3.362913  |
|        | 2230731 | H2-T17        | 3.3515167 |
| 55932  | 1690475 | Gbp4          | 3.3509989 |
|        | 6350189 | Trex1         | 3.349725  |
|        | 780221  | H2-T9         | 3.3308468 |
|        | 3780736 | H2-K1         | 3.3197384 |
|        | 6450682 | H2-L          | 3.292021  |
|        | 4010288 | 4930599N23Rik | 3.263419  |
|        | 6940435 | 2310022K01Rik | 3.2409334 |
|        | 2600021 | C330011F01Rik | 3.2387397 |
| 319168 | 1470341 | Hist1h2ah     | 3.2357116 |
| 18971  | 5220358 | Pold1         | 3.2345538 |
| 319169 | 3130609 | Hist1h2ak     | 3.2256048 |
| 101739 | 430204  | Psip1         | 3.2193174 |
| 414801 | 2940612 | BC063749      | 3.216898  |
|        | 2490142 | Ddx58         | 3.204791  |
|        | 4730367 | lfi30         | 3.2008178 |
|        | 990615  | LOC239122     | 3.200462  |
| 67177  | 1050706 | Ris2          | 3.1697319 |
| 102871 | 430079  | D330045A20Rik | 3.1551597 |
| 243771 | 1340050 | Zc3hdc1       | 3.146364  |
|        | 5340762 | AW212394      | 3.1390858 |
|        | 3420095 | Whsc1         | 3.1265082 |
| 319165 | 3520717 | Hist1h2ad     | 3.115046  |
|        | 5900520 | Gbp5          | 3.0711741 |
| 17217  | 2320368 | Mcm4          | 3.0686355 |

|        |         |               |           |
|--------|---------|---------------|-----------|
|        | 70348   | Adar          | 3.0637124 |
|        | 2360646 | 4930579G24Rik | 3.0491064 |
| 14841  | 6420215 | Gsg2          | 3.0468266 |
| 101565 | 3420521 | 6330503K22Rik | 3.0295348 |
| 70454  | 2000139 | Cenpl         | 3.019322  |
|        | 610743  | Nasp          | 2.9920003 |
|        | 6250437 | Ddx11         | 2.9897318 |
|        | 1170402 | B130065G19Rik | 2.9879234 |
|        | 1780452 | Fbxw17        | 2.9794774 |
| 56452  | 6060376 | Orc6l         | 2.9767556 |
|        | 6760390 | H2-L          | 2.959023  |
| 108670 | 2760274 | 2310046K10Rik | 2.9193912 |
|        | 620577  | 4930599N23Rik | 2.9126694 |
| 56417  | 1780154 | Adar          | 2.9054666 |
| 78658  | 2750114 | B130055D15Rik | 2.9048011 |
| 210106 | 7510743 | Pols          | 2.901843  |
|        | 3440615 | Dscr1         | 2.892768  |
|        | 3870706 | AW540478      | 2.844576  |
|        | 4290709 | lfi30         | 2.8440914 |
| 55932  | 60553   | Gbp4          | 2.8426292 |
|        | 3400491 | Clic4         | 2.8323479 |
|        | 3390735 | Nasp          | 2.8069084 |
| 72140  | 3990255 | 2610507L03Rik | 2.780156  |
|        | 4120014 | lfi35         | 2.771492  |
| 74257  | 4880026 | Tspan17       | 2.76344   |
| 380732 | 5960678 | Gm885         | 2.7553382 |
|        | 1990221 | Ccl12         | 2.7304683 |
| 19650  | 4890291 | Rbl1          | 2.7213686 |
| 72549  | 6250424 | 2700029E10Rik | 2.7195938 |
|        | 7650228 | LOC380732     | 2.7056408 |
|        | 1770754 | 5830411K18Rik | 2.7024515 |
| 14760  | 3420326 | Gpr19         | 2.6994576 |
|        | 5290112 | Rangap1       | 2.6608508 |
|        | 1110543 | Trim30        | 2.65025   |
|        | 10167   | LOC56628      | 2.6476412 |
| 74137  | 1770592 | 1200013B22Rik | 2.6413262 |
| 15040  | 4010154 | H2-T23        | 2.6281953 |
| 15040  | 7200100 | H2-T23        | 2.597183  |
|        | 1940338 | H2-M3         | 2.5606103 |
| 17215  | 2360193 | Mcm3          | 2.556915  |
| 101565 | 5080162 | 6330503K22Rik | 2.5545757 |
| 16145  | 6290037 | lgtp          | 2.552399  |
| 214444 | 110494  | Cdk5rap2      | 2.5231538 |
| 17069  | 6550376 | Ly6e          | 2.453925  |
| 319173 | 4250711 | Hist1h2af     | 2.4521556 |
|        | 4200202 | 6330500D04Rik | 2.4188282 |
| 15896  | 7510452 | Icam2         | 2.4179997 |
| 104806 | 1980341 | Fancm         | 2.40774   |

|        |         |               |            |
|--------|---------|---------------|------------|
| 66131  | 3990326 | Tipin         | 2.3965726  |
|        | 4810358 | Dsip1         | 2.3932896  |
| 17215  | 7570014 | Mcm3          | 2.3886893  |
| 67824  | 6450072 | 1110025F24Rik | 2.3805692  |
|        | 1230241 | 4631422C13Rik | 2.3778486  |
|        | 2970598 | Map3k8        | 2.3416035  |
|        | 1510121 | BC003324      | 2.3383157  |
|        | 6840021 | Tuba6         | 2.3359573  |
| 329910 | 6250128 | Acot11        | 2.314527   |
|        | 4480102 | H2afv         | 2.2890203  |
| 51788  | 3140500 | H2afz         | 2.2864678  |
|        | 5720626 | Chc1          | 2.2620075  |
| 56045  | 3190577 | Samhd1        | 2.2548714  |
|        | 1710280 | BC027246      | 2.2478027  |
|        | 4480767 | Dnmt1         | 2.2403398  |
| 320394 | 3170154 | G630055P03Rik | 2.2341466  |
|        | 3840653 | Sag           | 2.2322276  |
| 105837 | 1980079 | Mtbp          | 2.220794   |
|        | 1230681 | LOC268569     | 2.215311   |
|        | 5090181 | Trrp2         | 2.2144773  |
| 69912  | 4730292 | Nup43         | 2.2114968  |
| 103468 | 7040035 | Nup107        | 2.2114663  |
|        | 4490239 | AI481105      | 2.2033606  |
|        | 5870519 | 4631410M14Rik | 2.1598518  |
| 76073  | 4150682 | 0610009F02Rik | 2.158504   |
| 72075  | 5690717 | Ogfr          | 2.1514513  |
| 16391  | 6520133 | lsgf3g        | 2.150713   |
|        | 2000541 | 2610207P08Rik | 2.1228254  |
|        | 4920598 | Pik3ap1       | 2.1102242  |
| 227613 | 5890162 | 4930542G03Rik | 2.1093855  |
| 14964  | 4060735 | H2-D1         | 2.103427   |
| 103268 | 6220133 | 2410017P07Rik | 2.1028826  |
| 212377 | 5290608 | F730047E07Rik | 2.1008997  |
|        | 380215  | Tor3a         | 2.081023   |
|        | 6450253 | 5830484A20Rik | 2.0580773  |
|        | 2450064 | Psmb9         | 2.0545812  |
| 16362  | 3360138 | Irf1          | 2.0500505  |
| 52009  | 50609   | Hn1l          | 2.0253005  |
|        | 10402   | Trim25        | 2.024748   |
| 12363  | 5290017 | Casp4         | 2.0126648  |
| 60533  | 3870561 | Pdcd1lg1      | 2.0046785  |
| 51788  | 6510575 | H2afz         | 2.0031264  |
| 319845 | 160291  | E130103117Rik | -2.0002742 |
| 56504  | 20465   | Stk23         | -2.0004938 |
| 16985  | 380482  | Lsp1          | -2.0060742 |
|        | 4920491 | 6720458D17Rik | -2.0211227 |
|        | 2970273 | 1200014P03Rik | -2.0282977 |
|        | 4290544 | Nav1          | -2.029888  |

|        |         |                |            |
|--------|---------|----------------|------------|
| 235504 | 160553  | Slc17a5        | -2.032318  |
| 22268  | 4880433 | Upk1b          | -2.0381157 |
| 19400  | 3370482 | Rapsn          | -2.0416818 |
| 13537  | 1170521 | Dusp2          | -2.0420175 |
| 19400  | 4880056 | Rapsn          | -2.0431368 |
|        | 4120615 | A930024F17Rik  | -2.0478303 |
|        | 5890110 | Cbfa2t3h       | -2.0522144 |
| 545007 | 1990021 | LOC545007      | -2.0700693 |
|        | 1050300 | Rgs2           | -2.0700793 |
| 66569  | 4280274 | 2610020H15Rik  | -2.080473  |
|        | 4260564 | Ppgb           | -2.0897908 |
| 215690 | 4850731 | Nav1           | -2.0990152 |
| 243813 | 4210300 | Leng9          | -2.1017935 |
| 109245 | 2690524 | 9430028I06Rik  | -2.1122112 |
|        | 4070025 | Slc12a2        | -2.119844  |
| 14697  | 830427  | Gnb5           | -2.1302993 |
|        | 540543  | Tm7sf3         | -2.1366732 |
|        | 7400348 | Arid3a         | -2.1454322 |
|        | 4560070 | Myo18b         | -2.1507146 |
| 13641  | 1400152 | Efnb1          | -2.15123   |
|        | 4860747 | B230363H02Rik  | -2.1644971 |
| 19376  | 1780025 | Rab34          | -2.171903  |
|        | 70386   | Satb1          | -2.1719966 |
|        | 4900372 | 4921531D08Rik  | -2.1847236 |
|        | 1710333 | Zdhhc14        | -2.1948388 |
|        | 1850437 | Armc3          | -2.1948707 |
| 23945  | 5310328 | Mgl1           | -2.1989791 |
|        | 6450520 | 7530408C15Rik  | -2.1999533 |
|        | 6940196 | Aatk           | -2.2241676 |
| 237052 | 4570468 | Tceal1         | -2.224956  |
| 545013 | 6180379 | LOC545013      | -2.2506144 |
|        | 840477  | scl0015365.1_6 | -2.25334   |
| 12345  | 2030215 | Capzb          | -2.254229  |
|        | 4830220 | Epn2           | -2.259134  |
|        | 2630364 | 1110021L09Rik  | -2.260399  |
|        | 1430368 | St6gal1        | -2.2709906 |
|        | 1240465 | A130020K16Rik  | -2.2821946 |
| 83679  | 6100612 | Pde4dip        | -2.2866604 |
| 52668  | 160437  | D12Ertd647e    | -2.2922044 |
|        | 6380201 | Nav1           | -2.296743  |
|        | 6420373 | 2810474C18Rik  | -2.3001792 |
| 18670  | 7210136 | Abcb4          | -2.3056488 |
| 52668  | 1110280 | D12Ertd647e    | -2.309649  |
| 17826  | 5720538 | Mtvr2          | -2.317834  |
| 12479  | 2490577 | Cd1d1          | -2.3184435 |
|        | 6660181 | Peg13          | -2.3247225 |
|        | 5870044 | 1110012N22Rik  | -2.3322668 |
|        | 4780040 | Abcc3          | -2.339223  |

|        |         |                          |            |
|--------|---------|--------------------------|------------|
| 69032  | 2340255 | Lyzl4                    | -2.3454106 |
| 13650  | 3840598 | Rhbdf1                   | -2.3529408 |
|        | 3460110 | 5031436O03Rik            | -2.3533027 |
| 74202  | 4260195 | Fblim1                   | -2.3574107 |
|        | 7150356 | Hist2h2aa1               | -2.3662019 |
|        | 670440  | Rgs2                     | -2.3817487 |
|        | 3120129 | Gprasp1                  | -2.3840296 |
| 109711 | 4590136 | Actn1                    | -2.3856559 |
| 407831 | 5360750 | BC054438                 | -2.390279  |
|        | 5820196 | 2310040B03Rik            | -2.3965101 |
|        | 5900575 | Il6st                    | -2.3983967 |
|        | 2480041 | 2010320M18Rik            | -2.406179  |
| 17179  | 1940646 | Matk                     | -2.408773  |
|        | 2630086 | 9630015D15Rik            | -2.4223473 |
| 52666  | 290348  | D10ErtD610e              | -2.4268925 |
|        | 1340224 | BC044804                 | -2.432248  |
| 109652 | 2370148 | Acy1                     | -2.4812126 |
| 109652 | 1510669 | Acy1                     | -2.4880714 |
| 229499 | 6980440 | A230020G22Rik            | -2.490682  |
|        | 6980292 | scl00001.1_0_REVCO<br>MP | -2.516428  |
|        | 5700681 | 6330400D04               | -2.519962  |
|        | 270601  | 1700110I01Rik            | -2.5328107 |
|        | 5290441 | A730063M14Rik            | -2.5495243 |
| 65112  | 3420544 | Tmepai                   | -2.5505898 |
|        | 6980630 | Fhit                     | -2.5622401 |
| 70882  | 1440706 | Armc3                    | -2.56744   |
|        | 20255   | 2900026A02Rik            | -2.5767481 |
|        | 4120286 | F630025I20Rik            | -2.596889  |
| 229499 | 2490066 | A230020G22Rik            | -2.6237798 |
|        | 1940215 | 2700046G09Rik            | -2.6783268 |
|        | 520692  | E130115E03Rik            | -2.6837754 |
|        | 5810598 | Col6a3                   | -2.7084057 |
| 17179  | 3440397 | Matk                     | -2.7228594 |
|        | 1030730 | scl0002786.1_3           | -2.7271452 |
|        | 3290156 | 2310047K21Rik            | -2.7570727 |
|        | 2630605 | F730031O20Rik            | -2.7588706 |
|        | 5050066 | Ppm1l                    | -2.770062  |
|        | 5890097 | Sema4b                   | -2.7841656 |
|        | 6420750 | Sall2                    | -2.8113825 |
| 11732  | 3800670 | Ank                      | -2.8429902 |
|        | 3060600 | Rab6b                    | -2.8640473 |
|        | 5720091 | C330013E15Rik            | -2.8717666 |
| 12458  | 1010132 | Ccr6                     | -2.8861675 |
|        | 3440224 | E130115E03Rik            | -2.8952782 |
| 105193 | 1710736 | Nhlrc1                   | -2.9281452 |
| 17965  | 3850255 | Nbl1                     | -2.9304714 |
| 102657 | 5860327 | 6030411F23Rik            | -2.9486904 |

|        |         |               |            |
|--------|---------|---------------|------------|
| 16643  | 4890279 | Klrd1         | -2.951237  |
| 21928  | 1070630 | Tnfaip2       | -2.9553328 |
| 320333 | 1580386 | D830030K20Rik | -3.0024807 |
|        | 20615   | Ppm1l         | -3.0160806 |
|        | 1850315 | Sox4          | -3.1069684 |
| 21935  | 2940482 | Tnfrsf17      | -3.1834717 |
|        | 5570132 | Ppm1l         | -3.2246766 |
|        | 6650477 | Ian6          | -3.2702284 |
|        | 940025  | LOC384472     | -3.2945483 |
|        | 6980609 | 6430590I03Rik | -3.3038375 |
| 14369  | 6020424 | Fzd7          | -3.3285582 |
| 654812 | 6520451 | Angptl7       | -3.3493447 |
|        | 1940040 | 4931406O17Rik | -3.4370441 |
| 16644  | 4290521 | Kng1          | -3.478689  |
|        | 2100468 | Tlr5          | -3.4942641 |
| 54368  | 4280414 | Gp9           | -3.531131  |
|        | 580259  | Catnd2        | -3.5795825 |
|        | 3140397 | Gprasp2       | -3.7651544 |
| 117590 | 6400360 | Asb10         | -3.971728  |
| 544988 | 610091  | LOC544988     | -4.0657215 |
|        | 4780201 | A830087P12Rik | -4.3517666 |
|        | 610685  | A130039H17Rik | -6.361968  |
|        | 4200546 | Adcy8         | -6.4349313 |
|        | 3170692 | Slc5a10       | -6.48146   |
|        | 2650010 | Cadps         | -6.834843  |
| 70925  | 4290154 | 4921511I16Rik | -10.063032 |
|        | 3290725 | Rgs11         | -11.553921 |
|        | 150209  | A430006M23Rik | -11.555361 |
|        | 290193  | LOC239618     | -12.428441 |
| 545015 | 3310195 | 2610042L04Rik | -34.846573 |

Supplementary table S2: Differentially expressed genes d7.

| Entrez Gene ID | ProbeID | Gene symbol        | Fold change vs naïve |
|----------------|---------|--------------------|----------------------|
|                | 3420139 | Il1r2              | 1738.9353            |
|                | 1050092 | Serpina3g          | 1178.2552            |
|                | 3170487 | F730004D16Rik      | 624.3466             |
|                | 540647  | Cd69               | 414.19824            |
| 18175          | 3170047 | Nrap               | 394.08554            |
|                | 4730246 | LOC226690          | 378.60544            |
| 231655         | 4780253 | Oasl1              | 376.06052            |
| 13034          | 2140639 | Ctse               | 363.12418            |
| 229595         | 130192  | Tsrc1              | 349.7525             |
| 53608          | 7200025 | Map3k6             | 289.86234            |
| 110168         | 2750543 | Gpr18              | 289.33148            |
| 246728         | 3060450 | Oas2               | 246.03413            |
|                | 6400719 | Saa3               | 245.93185            |
|                | 7400528 | Ifi205             | 243.71439            |
| 72054          | 2120392 | Cyp4f18            | 243.066              |
|                | 6450259 | Ifi205             | 234.6777             |
|                | 7560307 | Irg1               | 205.81625            |
| 231655         | 240187  | Oasl1              | 199.63985            |
|                | 5340577 | Xdh                | 191.93933            |
|                | 60368   | Slp                | 189.24611            |
| 14469          | 6860600 | Gbp2               | 185.7916             |
| 68713          | 4010019 | Ifitm1             | 181.21935            |
|                | 130348  | Slp                | 175.14546            |
|                | 4540082 | BC049975           | 162.00958            |
|                | 7650048 | Fpr-rs2            | 160.59178            |
|                | 5820709 | LOC240921          | 157.56786            |
|                | 7550156 | Ccnb1              | 157.49164            |
|                | 1710619 | Ifi205             | 149.37787            |
| 58217          | 4280504 | Trem1              | 141.02757            |
|                | 10598   | Cxcl9              | 137.17833            |
| 100034251      | 5360370 | LOC100034251       | 124.585785           |
|                | 2190133 | Ifi205             | 123.875114           |
| 70218          | 2680010 | 3000004C01Rik      | 123.54543            |
|                | 5360082 | scavenger receptor | 123.53146            |
|                | 4810184 | Dlm1-pending       | 122.84565            |
|                | 580470  | Tnfrsf5            | 122.406746           |
| 20555          | 3520746 | Slfn1              | 121.54738            |
| 58185          | 5560474 | 2510004L01Rik      | 120.90678            |
| 433470         | 7160047 | AA467197           | 117.978874           |
|                | 4570458 | Sn                 | 116.352745           |
| 231655         | 840259  | Oasl1              | 113.63243            |
|                | 3840575 | Cd244              | 113.0421             |
| 18106          | 4540064 | Cd244              | 112.13112            |
| 12268          | 2350291 | C4                 | 108.33983            |
|                | 5490026 | Emilin2            | 107.48486            |
| 545384         | 1690292 | BC094916           | 106.09906            |



|        |         |                |            |
|--------|---------|----------------|------------|
|        | 5290546 | Ctse           | 105.12385  |
|        | 1230639 | F10            | 104.386406 |
| 246707 | 5910164 | Emilin2        | 103.78914  |
|        | 6590653 | Irf7           | 101.734886 |
| 16790  | 4150193 | Anpep          | 97.24225   |
| 12268  | 6510113 | C4             | 93.57881   |
| 14469  | 2100068 | Gbp2           | 91.271385  |
|        | 2810612 | Birc5          | 90.84561   |
| 75750  | 4060100 | 8430417G17Rik  | 90.55123   |
|        | 130288  | A630085K21     | 84.78844   |
| 18712  | 5860039 | Pim1           | 82.135574  |
| 74568  | 630025  | Mkl            | 82.00036   |
|        | 3990711 | 9930022F21Rik  | 80.215256  |
| 20716  | 2450347 | Serpina3n      | 80.012634  |
| 15951  | 3060554 | Ifi204         | 79.68101   |
| 15958  | 5270398 | Ifit2          | 78.73005   |
|        | 2190164 | Ccnb1          | 77.84311   |
| 12268  | 7510243 | C4             | 77.391754  |
|        | 4210239 | Slc4a8         | 75.782936  |
| 15953  | 1090139 | Ifi47          | 73.65926   |
|        | 4920019 | scl0003154.1_1 | 73.164566  |
| 15958  | 360041  | Ifit2          | 72.548454  |
| 226421 | 2940176 | 5430435G22Rik  | 71.47891   |
| 80885  | 5700161 | Gpr109a        | 70.25981   |
| 15951  | 7550093 | Ifi204         | 68.763565  |
|        | 7210184 | scl000868.1_2  | 68.13868   |
|        | 6020487 | Cyp4f18        | 68.06434   |
|        | 1580008 | Aim1           | 67.17701   |
|        | 3780474 | 9930016I07Rik  | 66.87922   |
| 16421  | 830543  | Itgb7          | 66.24978   |
| 231507 | 5860243 | Plac8          | 63.796135  |
|        | 5670240 | Map3k6         | 61.7045    |
|        | 1500446 | Cdca8          | 58.5363    |
|        | 1660184 | Ifi205         | 57.770176  |
| 70218  | 1710368 | 3000004C01Rik  | 57.555767  |
| 16169  | 6400270 | Il15ra         | 57.363308  |
| 382045 | 4890092 | Gpr114         | 56.143127  |
| 20343  | 5360707 | Sell           | 55.43505   |
|        | 6420170 | BC006779       | 54.923664  |
| 16571  | 6660050 | Kif4           | 53.191395  |
| 229003 | 450706  | BC006779       | 52.501328  |
| 68713  | 5960577 | Ifitm1         | 51.50538   |
|        | 6940398 | LOC270152      | 50.494034  |
|        | 160041  | Mmp25          | 50.069683  |
|        | 430202  | Top2a          | 49.045677  |
| 15959  | 670670  | Ifit3          | 48.86549   |
|        | 4890689 | Oas3           | 48.21454   |
| 77037  | 5870487 | 1110025G12Rik  | 47.907784  |
|        | 2190215 | Cxcl10         | 47.90023   |
|        | 1240538 | P2ry14         | 46.20078   |
|        | 7400215 | Birc5          | 44.007782  |

|        |         |               |           |
|--------|---------|---------------|-----------|
|        | 2630066 | Ckap2         | 43.676556 |
| 219131 | 6660327 | Phf11         | 43.559006 |
|        | 3290292 | Mx1           | 42.183247 |
| 102084 | 520040  | Al451557      | 42.0044   |
| 14262  | 6020441 | Fmo3          | 41.94585  |
|        | 830072  | Lilrb4        | 41.883453 |
| 219131 | 1340193 | Phf11         | 40.53121  |
| 15959  | 3460504 | Ifit3         | 40.514084 |
|        | 2370630 | 2610204M08Rik | 40.457348 |
|        | 940180  | 1500004A08Rik | 40.194153 |
| 14967  | 5050451 | H2-D4         | 39.440598 |
| 16541  | 5690500 | Napsa         | 39.22705  |
| 15945  | 3140209 | Cxcl10        | 39.11977  |
| 16174  | 430446  | Il18rap       | 38.17255  |
| 14469  | 1400041 | Gbp2          | 37.915585 |
| 16012  | 7380603 | Igfbp6        | 37.524082 |
|        | 610324  | Cd3d          | 37.4796   |
| 19340  | 1470278 | Rab3d         | 37.32802  |
| 18610  | 3610332 | Pdyn          | 37.00595  |
| 16169  | 5360678 | Il15ra        | 36.09149  |
| 57444  | 540411  | Isg20         | 35.519783 |
| 320832 | 5090491 | Sirpb1        | 35.38076  |
| 66141  | 3840292 | Ifitm3        | 34.70865  |
|        | 3830328 | Cdc25c        | 34.69117  |
| 12263  | 4210470 | C2            | 34.474133 |
| 23962  | 7050014 | Oasl2         | 34.468334 |
|        | 3840523 | Kif23         | 33.86732  |
|        | 1410554 | Tyki          | 33.596855 |
|        | 6580379 | P2ry14        | 33.438328 |
| 71819  | 4850079 | Kif23         | 33.41603  |
| 23962  | 4830010 | Oasl2         | 32.598    |
| 57746  | 6020187 | Piwil2        | 32.320778 |
|        | 1240446 | Birc5         | 31.8259   |
|        | 3180438 | 2010317E24Rik | 31.57636  |
| 58203  | 1580634 | Zbp1          | 31.169638 |
|        | 160392  | Cxcr4         | 31.085121 |
| 217430 | 5890523 | Pqlc3         | 30.989872 |
|        | 4050037 | 2310051E17Rik | 30.516329 |
|        | 4830273 | Slc4a8        | 30.374073 |
| 20304  | 1690768 | Ccl5          | 30.106688 |
| 16169  | 4540403 | Il15ra        | 30.008772 |
|        | 7040195 | Gpr83         | 29.785194 |
|        | 540438  | LOC328752     | 29.579683 |
|        | 5820128 | 0610037M15Rik | 28.806526 |
| 15959  | 7510020 | Ifit3         | 28.26784  |
|        | 270010  | Etv4          | 27.975542 |
| 13601  | 1710242 | Ecm1          | 27.507017 |
| 20684  | 1170110 | Sp100         | 27.380056 |
|        | 2850717 | H2-Q8         | 27.256311 |
|        | 6250148 | Dpep2         | 26.999645 |
|        | 7200037 | Adam8         | 26.899242 |

|        |         |               |           |
|--------|---------|---------------|-----------|
|        | 4830543 | 2310061N23Rik | 26.670538 |
| 13587  | 5870605 | Ear2          | 26.616695 |
| 21822  | 3890121 | Tgtp          | 26.397688 |
|        | 3940242 | AA175286      | 26.321419 |
|        | 4810324 | Serping1      | 26.261782 |
| 14190  | 2340242 | Fgl2          | 26.0683   |
| 16497  | 6130471 | Kcnab1        | 25.786854 |
| 29870  | 1780719 | Gtse1         | 25.688337 |
| 217430 | 7650767 | Pqlc3         | 25.38263  |
| 109979 | 5890338 | Art3          | 25.015984 |
|        | 650717  | Lilrb4        | 24.588425 |
| 53606  | 460221  | G1p2          | 24.55848  |
| 14744  | 5670687 | Gpr65         | 24.491701 |
| 244183 | 4390594 | A530023O14Rik | 24.270988 |
|        | 4730524 | 5430435G22Rik | 24.24874  |
| 227659 | 7400286 | Slc2a6        | 24.00264  |
| 228421 | 3180164 | Kif18a        | 23.589624 |
|        | 6280521 | A530060O05Rik | 23.228249 |
| 18726  | 5870113 | Pira3         | 23.194569 |
| 327954 | 2900747 | Dnahc2        | 23.014349 |
| 384009 | 3940639 | Glpr2         | 22.771723 |
| 233406 | 780475  | Prc1          | 22.764912 |
| 73804  | 1780543 | Kif2c         | 22.484962 |
|        | 3420433 | Il12rb1       | 22.17348  |
| 80876  | 840349  | Ifitm2        | 22.117163 |
| 20359  | 1470431 | Sema6b        | 21.456257 |
|        | 5080326 | S100a6        | 21.447649 |
|        | 4880020 | 2410187C16Rik | 21.302517 |
| 20307  | 2480296 | Ccl8          | 21.234295 |
| 16541  | 4830551 | Napsa         | 21.201355 |
|        | 1090647 | 9830148G24Rik | 21.089972 |
|        | 4070148 | Ear1          | 21.07106  |
| 24110  | 4610139 | Usp18         | 20.82286  |
|        | 2490653 | LOC240327     | 20.378166 |
|        | 7400392 | Sepw1         | 20.134321 |
|        | 7040475 | 2610019I03Rik | 20.124168 |
|        | 3800136 | Sepx1         | 20.08394  |
| 67775  | 2760577 | Rtp4          | 20.039913 |
| 59027  | 2750189 | Pbef1         | 19.794659 |
|        | 6510241 | LOC381329     | 19.725481 |
| 16601  | 4210327 | Bteb1         | 19.36106  |
| 170741 | 4570204 | Pilrb         | 19.349173 |
| 21853  | 160703  | Timeless      | 19.271843 |
|        | 6590064 | Mrpl15        | 18.818035 |
|        | 2030382 | A930023F12Rik | 18.803095 |
| 16169  | 6650142 | Il15ra        | 18.628473 |
| 18793  | 5720497 | Plaur         | 18.598827 |
|        | 2230538 | Cd44          | 18.14901  |
|        | 4260220 | LOC269531     | 18.10373  |
|        | 1990397 | A630047J05Rik | 18.053263 |
|        | 3890682 | 2610036L11Rik | 18.032915 |

|        |         |               |            |
|--------|---------|---------------|------------|
|        | 2650703 | 9830002L24Rik | 17.911345  |
|        | 6590239 | Cd3e          | 17.803812  |
| 74107  | 3710050 | 1200008O12Rik | 17.48792   |
| 12268  | 1010632 | C4            | 17.380741  |
|        | 4570722 | Arhgap15      | 17.371712  |
|        | 7160241 | Cybb          | 17.363625  |
|        | 2350095 | Bub1b         | 17.307188  |
|        | 6580139 | Itgp          | 17.305918  |
| 74481  | 7160246 | 4933430F08Rik | 17.218475  |
| 15019  | 2750128 | H2-Q8         | 17.208536  |
| 16859  | 2350537 | Lgals9        | 16.909136  |
| 24110  | 2490452 | Usp18         | 16.886606  |
|        | 1440139 | D11Lgp2e      | 16.613499  |
| 217430 | 3180152 | Pqlc3         | 16.34599   |
| 327957 | 1190477 | A430084P05Rik | 16.291286  |
| 107995 | 4570088 | Cdc20         | 16.014475  |
|        | 7380324 | scl000868.1_2 | 15.95385   |
| 16497  | 2570608 | Kcnab1        | 15.946501  |
| 14793  | 1050170 | Cdca3         | 15.603108  |
|        | 4040095 | H2-Q6         | 15.550358  |
| 15944  | 7380221 | Irgm          | 15.520722  |
| 20847  | 6220594 | Stat2         | 15.200038  |
| 24110  | 1580528 | Usp18         | 15.180186  |
| 237256 | 6510142 | D730019B10Rik | 14.946174  |
| 16854  | 510474  | Lgals3        | 14.723739  |
|        | 1400220 | LOC215405     | 14.715667  |
| 23960  | 3890328 | Oas1g         | 14.694639  |
| 56620  | 5360056 | Clec4n        | 14.434021  |
| 22352  | 1690091 | Vim           | 14.369492  |
| 23961  | 5550010 | Oas1b         | 14.200897  |
| 23960  | 130598  | Oas1g         | 14.182916  |
|        | 4850689 | A130019H11Rik | 14.169334  |
| 19200  | 2360554 | Pstpip1       | 13.971952  |
|        | 870221  | Oas1a         | 13.947911  |
| 71712  | 5270100 | 1200002N14Rik | 13.89088   |
|        | 4220162 | Stx11         | 13.698195  |
| 60533  | 3870561 | Pdcd1lg1      | 13.669132  |
|        | 1820164 | Zbtb16        | 13.595215  |
| 107995 | 4610722 | Cdc20         | 13.5548115 |
| 20359  | 2600561 | Sema6b        | 13.525599  |
| 16574  | 3190639 | Kif5c         | 13.440753  |
|        | 1090382 | Cdkn3         | 13.358812  |
| 110454 | 1690187 | Ly6a          | 13.109668  |
| 74747  | 130634  | Ddit4         | 13.0422535 |
| 68278  | 2940685 | Ddx39         | 12.985363  |
|        | 6450634 | 1110017L21Rik | 12.865931  |
|        | 4640754 | F730045P10Rik | 12.845463  |
|        | 240491  | Osm           | 12.822292  |
| 70466  | 2450270 | 2610318C08Rik | 12.7789135 |
|        | 3360273 | A630059M09Rik | 12.772151  |
| 217946 | 4220139 | BC006933      | 12.735246  |

|        |         |               |            |
|--------|---------|---------------|------------|
| 246256 | 830632  | Fcrl3         | 12.401696  |
|        | 3520142 | Rog           | 12.352537  |
|        | 270193  | Tnfsf13b      | 12.3504    |
|        | 5390088 | LOC327957     | 12.330446  |
|        | 6520193 | Dnase1l3      | 12.29059   |
|        | 6760669 | Mafk          | 12.191158  |
| 80861  | 6330592 | D11Lgp2e      | 11.935271  |
|        | 520278  | Mx2           | 11.761493  |
|        | 6130682 | BC003281      | 11.732226  |
|        | 5720397 | D11Lgp2e      | 11.684268  |
| 18301  | 2630008 | Fxyd5         | 11.543703  |
|        | 5820767 | 4930477M19    | 11.300333  |
| 219132 | 2810040 | D14Erttd668e  | 11.199702  |
| 208104 | 2030520 | B930074124    | 11.182083  |
|        | 6770195 | li            | 11.144681  |
|        | 6450598 | D11Lgp2e      | 11.105779  |
| 547343 | 1400132 | LOC547343     | 10.923836  |
|        | 5860053 | LOC381287     | 10.91014   |
|        | 3780102 | 1810049K24Rik | 10.704086  |
|        | 1340500 | AW125391      | 10.67308   |
| 15944  | 5820608 | lrgm          | 10.640523  |
| 12575  | 2070377 | Cdkn1a        | 10.639942  |
| 21354  | 5870093 | Tap1          | 10.6270895 |
|        | 6290592 | LOC226691     | 10.529066  |
|        | 1710040 | LOC328833     | 10.462428  |
|        | 3360338 | li            | 10.235244  |
| 93695  | 4670228 | Gpnmb         | 10.058177  |
| 99526  | 510400  | Usp53         | 10.054506  |
|        | 4900167 | 1810054D07Rik | 9.985916   |
| 414801 | 2940612 | BC063749      | 9.948042   |
|        | 4610433 | Prg           | 9.912737   |
|        | 1110445 | LOC380706     | 9.774183   |
| 15016  | 6980075 | H2-Q5         | 9.767257   |
|        | 6370333 | 4933424C13Rik | 9.762396   |
|        | 2680066 | LOC245884     | 9.753611   |
| 18301  | 4780196 | Fxyd5         | 9.752572   |
| 81703  | 5860717 | Jundm2        | 9.740368   |
|        | 2490328 | Pml           | 9.696      |
| 20556  | 4120307 | Slfn2         | 9.694468   |
|        | 6650070 | Pscdbp        | 9.66911    |
| 23961  | 3180445 | Oas1b         | 9.617245   |
| 12575  | 7040491 | Cdkn1a        | 9.581253   |
|        | 7200093 | 4930412M03Rik | 9.531002   |
|        | 1660056 | lpas          | 9.453965   |
|        | 6760762 | Sdc3          | 9.253004   |
| 11837  | 5570093 | Arbp          | 9.218644   |
|        | 4010343 | Sepx1         | 9.167709   |
| 12575  | 3130630 | Cdkn1a        | 9.072537   |
| 667977 | 270367  | H2-gs17       | 8.926894   |
|        | 4880639 | 2810021O14Rik | 8.896405   |
| 219132 | 520053  | D14Erttd668e  | 8.892437   |

|        |         |               |           |
|--------|---------|---------------|-----------|
|        | 3840521 | Nfil3         | 8.86413   |
|        | 7000059 | 1300013D05Rik | 8.84362   |
| 22021  | 2120463 | Tpst1         | 8.743125  |
|        | 4830538 | Iqgap1        | 8.7241125 |
| 232925 | 380148  | Igfl3         | 8.671658  |
|        | 3140446 | 2310020F24Rik | 8.646372  |
|        | 3290707 | Tnfsf10       | 8.595983  |
|        | 4120687 | Glipr2        | 8.571342  |
| 21816  | 6270040 | Tgm1          | 8.562749  |
| 27052  | 5700538 | Aoah          | 8.553813  |
|        | 3710161 | Crk           | 8.425027  |
|        | 4730440 | D4Ertd432e    | 8.296131  |
| 56045  | 3190577 | Samhd1        | 8.289592  |
| 26362  | 7100577 | Axl           | 8.283421  |
| 14229  | 4850176 | Fkbp5         | 7.887502  |
| 18413  | 6270600 | Osm           | 7.8225384 |
| 12257  | 6270709 | Tspo          | 7.808455  |
|        | 5560437 | 6530401N04Rik | 7.735415  |
|        | 160463  | Lgals3bp      | 7.654424  |
| 12257  | 4670544 | Tspo          | 7.6079307 |
| 12257  | 2760544 | Tspo          | 7.592547  |
|        | 7200519 | Cenpa         | 7.571469  |
|        | 2510333 | Ccl12         | 7.570478  |
|        | 50059   | Al504432      | 7.5653105 |
| 14538  | 1070242 | Gcnt2         | 7.558873  |
|        | 3830377 | Iqgap1        | 7.5233083 |
|        | 3460296 | Anxa2         | 7.484685  |
|        | 4250059 | Notch4        | 7.4629498 |
|        | 4540477 | C920004C08Rik | 7.3072567 |
|        | 2850600 | Alkbh         | 7.294417  |
| 18724  | 4280187 | Pira11        | 7.216983  |
|        | 6380669 | Notch4        | 7.143372  |
| 15024  | 870446  | H2-T10        | 7.133779  |
|        | 7100592 | Crk           | 7.1114135 |
| 22321  | 6840408 | Vars          | 6.9417734 |
| 110749 | 7200270 | Chaf1b        | 6.9409776 |
| 59027  | 1780600 | Pbef1         | 6.9394655 |
|        | 2370707 | Cpeb2         | 6.89005   |
|        | 2320403 | Gch1          | 6.8550844 |
| 14538  | 6270739 | Gcnt2         | 6.8463273 |
|        | 5490187 | Prg           | 6.8226147 |
|        | 5910070 | 1700029M20Rik | 6.6616583 |
| 19652  | 460100  | Rbm3          | 6.6158233 |
| 56628  | 1710768 | LOC56628      | 6.61271   |
|        | 3400491 | Clic4         | 6.604865  |
|        | 6980685 | Zfp26         | 6.595139  |
| 18787  | 4850563 | Serpine1      | 6.589715  |
|        | 990615  | LOC239122     | 6.5531454 |
|        | 6650278 | 2610507B11Rik | 6.503366  |
| 380753 | 1660615 | Atxn7l1       | 6.502496  |
| 16362  | 3360138 | Irf1          | 6.442806  |

|        |         |               |           |
|--------|---------|---------------|-----------|
| 14972  | 6280026 | H2-K1         | 6.434294  |
|        | 7210608 | Rnf149        | 6.3332925 |
|        | 6250674 | LOC211193     | 6.326254  |
|        | 6350114 | Ube2l6        | 6.2942476 |
|        | 6280221 | Sp100         | 6.2532887 |
|        | 2260431 | BC003314      | 6.239597  |
|        | 4480685 | H2-T22        | 6.1884785 |
|        | 4540291 | Klf13         | 6.0881124 |
|        | 5270475 | Trex1         | 6.081574  |
|        | 6590215 | H2-T22        | 6.0551276 |
|        | 1990221 | Ccl12         | 6.0475936 |
|        | 2970274 | 2610029J22Rik | 6.021704  |
|        | 4220273 | 5830458K16Rik | 5.912246  |
| 18768  | 110593  | Pkib          | 5.906133  |
| 16188  | 2600240 | Il3ra         | 5.8800983 |
|        | 2030056 | C130032L16Rik | 5.872933  |
| 630499 | 4640348 | EG630499      | 5.862693  |
| 236904 | 1780356 | Klhl15        | 5.8315563 |
|        | 460072  | Csf2rb1       | 5.8219905 |
| 208727 | 1240433 | 4932408F19Rik | 5.769556  |
|        | 7330424 | D19Erttd678e  | 5.746041  |
|        | 780274  | Auh           | 5.6847887 |
|        | 1470605 | D11Erttd759e  | 5.6647997 |
|        | 6350189 | Trex1         | 5.6476965 |
| 55932  | 60553   | Gbp4          | 5.602284  |
| 53313  | 60288   | Atp2a3        | 5.5642796 |
| 13367  | 7000390 | Diap1         | 5.56363   |
| 20527  | 460327  | Slc2a3        | 5.535356  |
| 16319  | 630634  | Incenp        | 5.524906  |
|        | 1050672 | Dab2          | 5.510707  |
| 231532 | 3800528 | Arhgap24      | 5.486095  |
|        | 6270292 | 4921524J06Rik | 5.4849505 |
| 22688  | 4490333 | Zfp26         | 5.457933  |
|        | 10228   | LOC384525     | 5.452973  |
|        | 6770674 | LOC381579     | 5.428852  |
|        | 2650326 | Pml           | 5.3893933 |
|        | 4150369 | Daxx          | 5.3743515 |
| 69710  | 770538  | Centd2        | 5.3463616 |
|        | 2970598 | Map3k8        | 5.332027  |
|        | 6450682 | H2-L          | 5.321051  |
| 56738  | 60600   | Mocs1         | 5.3052626 |
| 16362  | 3400288 | Irf1          | 5.3000603 |
|        | 6250600 | Cdkn2d        | 5.2991123 |
|        | 7040619 | Clic4         | 5.292379  |
| 320024 | 6960369 | Aadacl1       | 5.277836  |
| 55932  | 1690475 | Gbp4          | 5.2117867 |
| 74137  | 1770592 | 1200013B22Rik | 5.1964893 |
| 71778  | 6660707 | Klhl5         | 5.190814  |
| 19386  | 2630750 | Ranbp2        | 5.141782  |
|        | 830537  | LOC269515     | 5.1135335 |
|        | 5560349 | 2310015N21Rik | 5.0919943 |

|        |         |                |           |
|--------|---------|----------------|-----------|
|        | 5570020 | 1700027M01Rik  | 5.066368  |
|        | 5670164 | Afp            | 5.0219064 |
| 231713 | 6960170 | C330023M02Rik  | 5.020838  |
| 22321  | 1580044 | Vars           | 5.0135007 |
| 231713 | 2360709 | C330023M02Rik  | 5.00915   |
|        | 7210349 | Apobec3        | 4.97707   |
| 493809 | 1260020 | Taar3          | 4.9595256 |
| 102595 | 7330392 | Al840980       | 4.956658  |
|        | 6370204 | Tagln2         | 4.940986  |
| 12046  | 3520735 | Bcl2a1c        | 4.9259906 |
|        | 2630379 | BC048355       | 4.883624  |
| 13132  | 1050609 | Dab2           | 4.8824854 |
| 229900 | 6330692 | Gbp6           | 4.8516703 |
| 15018  | 6940386 | H2-Q7          | 4.8510656 |
|        | 3130750 | Ung            | 4.7990093 |
|        | 580438  | 2810431I02Rik  | 4.7805233 |
| 69710  | 5720594 | Centd2         | 4.754466  |
| 11898  | 7560338 | Ass1           | 4.735025  |
|        | 1170181 | Cd52           | 4.7019424 |
| 78781  | 520600  | Zc3hav1        | 4.673763  |
|        | 6760390 | H2-L           | 4.614608  |
|        | 1850068 | Pk3            | 4.6047325 |
|        | 6480653 | Al481105       | 4.596737  |
| 15013  | 5720048 | H2-Q2          | 4.595039  |
|        | 580142  | Zfp106         | 4.5948944 |
|        | 580746  | Rasgrf1        | 4.5899887 |
|        | 460184  | 9430029L20Rik  | 4.543333  |
| 15902  | 4490500 | Id2            | 4.5132313 |
|        | 2470356 | Cox6a2         | 4.510886  |
| 71839  | 430037  | 1700012B18Rik  | 4.5064573 |
|        | 6560431 | B630009B09Rik  | 4.481977  |
|        | 380215  | Tor3a          | 4.4670405 |
| 214639 | 940129  | 4930486L24Rik  | 4.463845  |
| 56417  | 1780154 | Adar           | 4.4280953 |
|        | 1580561 | C230091E20Rik  | 4.4277625 |
| 56075  | 5220110 | Pdss1          | 4.4270973 |
|        | 2650754 | Ube2l6         | 4.388617  |
|        | 5870563 | AW540478       | 4.3441715 |
| 15040  | 2350181 | H2-T23         | 4.328157  |
| 15902  | 1030519 | Id2            | 4.317474  |
|        | 780221  | H2-T9          | 4.3108706 |
| 17158  | 3400050 | Man2a1         | 4.3039985 |
| 243771 | 1340050 | Zc3hdc1        | 4.2973847 |
|        | 6270465 | Rasgrf1        | 4.246866  |
| 14964  | 4060735 | H2-D1          | 4.2292175 |
| 18626  | 20475   | Per1           | 4.2241583 |
|        | 2680687 | Zfp106         | 4.2235045 |
|        | 520025  | 2010002N04Rik  | 4.2208266 |
|        | 3140377 | scl0002116.1_6 | 4.216004  |
|        | 270711  | Galgt1         | 4.200215  |
|        | 1780452 | Fbxw17         | 4.195366  |



|        |         |                |           |
|--------|---------|----------------|-----------|
|        | 4490239 | AI481105       | 4.1942677 |
|        | 2230731 | H2-T17         | 4.186023  |
| 12696  | 6980576 | Cirbp          | 4.179338  |
|        | 2940138 | Ctla2b         | 4.176888  |
|        | 1010327 | Tor3a          | 4.164545  |
| 15040  | 4010154 | H2-T23         | 4.1311593 |
| 13367  | 3940021 | Diap1          | 4.117726  |
| 17913  | 7570494 | Myo1c          | 4.107861  |
| 68949  | 540138  | 1500012F01Rik  | 4.103646  |
| 108670 | 4880747 | 2310046K10Rik  | 4.0958786 |
| 15016  | 3130240 | H2-Q5          | 4.091906  |
| 68591  | 6480201 | Mocos          | 4.0858827 |
|        | 870070  | scl0003020.1_1 | 4.064895  |
|        | 2450577 | 1810054D07Rik  | 4.0627494 |
| 73094  | 3310474 | Sgip1          | 4.048459  |
|        | 3850324 | LOC381010      | 4.047519  |
| 12608  | 4230348 | Cebpb          | 4.0453777 |
|        | 3780736 | H2-K1          | 4.0449452 |
|        | 1710136 | 9626100_224    | 4.0164986 |
| 16362  | 6660634 | Irf1           | 3.9968076 |
| 75316  | 5220687 | Josd3          | 3.99293   |
|        | 4480543 | Mtf1           | 3.979722  |
|        | 10167   | LOC56628       | 3.9793358 |
| 380732 | 5960678 | Gm885          | 3.971681  |
| 71361  | 4490452 | Amid           | 3.9578784 |
|        | 240468  | Spint1         | 3.929983  |
| 15040  | 7200100 | H2-T23         | 3.8949783 |
|        | 6520431 | Adar           | 3.8893309 |
|        | 6510382 | 1810032O08Rik  | 3.8842642 |
| 231532 | 6550470 | Arhgap24       | 3.858585  |
| 114644 | 1850674 | Slc13a3        | 3.815194  |
|        | 7210711 | BC008150       | 3.8142629 |
|        | 4120014 | Ifi35          | 3.7912788 |
| 18626  | 2570037 | Per1           | 3.7906425 |
| 13664  | 2850487 | Eif1a          | 3.7673638 |
| 547253 | 2970521 | Parp14         | 3.7473128 |
| 216161 | 6220037 | BC019206       | 3.699811  |
|        | 6270296 | Slc9a3r1       | 3.690953  |
|        | 2490142 | Ddx58          | 3.67007   |
| 22321  | 4200543 | Vars           | 3.6588008 |
| 28088  | 5570296 | D10Wsu52e      | 3.6514256 |
|        | 4490475 | Flna           | 3.6510925 |
| 230279 | 2370669 | 6330416G13Rik  | 3.6317244 |
| 215474 | 110433  | Sec22c         | 3.6037812 |
| 17748  | 5220279 | Mt1            | 3.593315  |
|        | 2810735 | Cacna1s        | 3.581669  |
| 239647 | 2120187 | BC038822       | 3.496812  |
|        | 870593  | 9626100_15     | 3.4861646 |
|        | 2340543 | Tnfsf13        | 3.4842424 |
|        | 5220220 | 9626958_317    | 3.4706616 |
|        | 2710092 | 9030624G23Rik  | 3.4673681 |

|        |         |               |           |
|--------|---------|---------------|-----------|
| 231712 | 3440037 | Trafd1        | 3.4356985 |
| 231712 | 3800068 | Trafd1        | 3.4210925 |
|        | 7330719 | 2010012F05Rik | 3.4162972 |
| 114644 | 6980097 | Slc13a3       | 3.4146807 |
|        | 4730367 | Ifi30         | 3.4139001 |
| 213233 | 6480131 | Tapbpl        | 3.4079473 |
| 72056  | 150066  | 1810055G02Rik | 3.3965676 |
|        | 7610402 | LOC234582     | 3.3958387 |
|        | 3180754 | Acbd4         | 3.3927968 |
|        | 540603  | Rbms1         | 3.3911402 |
| 100608 | 3180403 | Al326906      | 3.357085  |
|        | 5890553 | Lss           | 3.347595  |
|        | 2760468 | BC062185      | 3.3268628 |
|        | 1110131 | LOC242051     | 3.3249    |
| 12363  | 5290017 | Casp4         | 3.2787597 |
|        | 3440021 | Csf1          | 3.2767231 |
|        | 4290709 | Ifi30         | 3.2754958 |
| 77056  | 2490465 | Tmco4         | 3.2589746 |
|        | 450368  | Rgs1          | 3.257137  |
| 12363  | 4290180 | Casp4         | 3.246286  |
|        | 1940338 | H2-M3         | 3.2418087 |
|        | 20692   | 2010107H07Rik | 3.2273057 |
|        | 7610743 | Cnr2          | 3.2212815 |
| 12517  | 5700528 | Cd72          | 3.2154794 |
| 16402  | 2070474 | Itga5         | 3.2139559 |
|        | 870243  | Ldlr          | 3.2067897 |
|        | 1440594 | Fnbp4         | 3.1955419 |
| 67171  | 1440639 | Tmem77        | 3.1805558 |
|        | 10402   | Trim25        | 3.1765685 |
|        | 7150367 | St14          | 3.162389  |
| 56878  | 10500   | Rbms1         | 3.1555548 |
| 93692  | 4050112 | Glrx          | 3.1493409 |
|        | 5360575 | LOC207695     | 3.1329749 |
| 170942 | 4880187 | Erdr1         | 3.1159425 |
|        | 1580754 | 2610014I16Rik | 3.0976145 |
|        | 5130037 | C130074J06Rik | 3.0933602 |
| 23833  | 6290768 | Cd52          | 3.0908515 |
| 16859  | 430132  | Lgals9        | 3.0874145 |
|        | 4830072 | Rgs1          | 3.0789595 |
| 208263 | 1010386 | MGC6357       | 3.078458  |
|        | 2760615 | 1500012F01Rik | 3.076689  |
|        | 3440685 | Spata6        | 3.0759506 |
| 212547 | 6520154 | BC027231      | 3.0737963 |
| 23790  | 3370195 | Coro1c        | 3.0562103 |
|        | 1240471 | Hmgn2         | 3.0396543 |
| 19165  | 990682  | Psen2         | 3.0393918 |
|        | 4830735 | E430031D18Rik | 3.0374937 |
|        | 3400452 | LOC383706     | 3.0356023 |
|        | 270717  | BC023741      | 3.0338452 |
|        | 3180025 | Ms4a6d        | 3.0262704 |
|        | 60152   | LOC328625     | 3.0164156 |

|        |         |                 |           |
|--------|---------|-----------------|-----------|
|        | 5960048 | scl0002018.1_19 | 3.0050728 |
|        | 1170195 | BC021438        | 2.997795  |
|        | 4040037 | Tpm4            | 2.9914114 |
|        | 3460037 | Fen1            | 2.98707   |
|        | 4290215 | Bmf             | 2.9859498 |
| 19186  | 940674  | Psme1           | 2.9852178 |
|        | 6290193 | 2510010K19Rik   | 2.978314  |
|        | 6420554 | 1810032O08Rik   | 2.954493  |
| 107734 | 580161  | Mrpl30          | 2.9465709 |
|        | 2100730 | F630107D10Rik   | 2.9456155 |
|        | 7100309 | 1700010A01Rik   | 2.945505  |
| 52502  | 7380364 | Carhsp1         | 2.9209874 |
|        | 4050609 | Vti1a           | 2.9092226 |
| 70155  | 5720440 | Ogfrl1          | 2.896157  |
| 77031  | 2340707 | Slc9a8          | 2.8901064 |
|        | 6960497 | Chka            | 2.8888726 |
|        | 770273  | BC013712        | 2.8837738 |
|        | 6900598 | 2310007G05Rik   | 2.8704562 |
| 74244  | 5310746 | Apg7l           | 2.863637  |
|        | 5670398 | Trim21          | 2.8592765 |
|        | 1110088 | Apobec1         | 2.8509338 |
|        | 3850041 | Ddx46           | 2.8455956 |
|        | 7550445 | Acbd4           | 2.841143  |
| 19186  | 6370494 | Psme1           | 2.8336074 |
| 50778  | 6840594 | Rgs1            | 2.833035  |
|        | 6580079 | Ubp1            | 2.8265107 |
| 53313  | 2570672 | Atp2a3          | 2.800754  |
|        | 2030519 | 2700024H10Rik   | 2.799765  |
|        | 2100193 | 1500032H18Rik   | 2.7934093 |
|        | 4010164 | 2310009B15Rik   | 2.777243  |
|        | 6270703 | Pvt1            | 2.7744508 |
| 16859  | 5390131 | Lgals9          | 2.7659416 |
| 67171  | 3290025 | Tmem77          | 2.7631838 |
| 231712 | 4570747 | Trafd1          | 2.7627528 |
| 170743 | 1570487 | Tlr7            | 2.7226593 |
|        | 1990524 | 4732435K05Rik   | 2.6945283 |
|        | 540259  | LOC230253       | 2.6830316 |
| 14252  | 2490739 | Flot2           | 2.676546  |
|        | 940278  | Scly            | 2.671533  |
|        | 3190468 | Camk2d          | 2.6533422 |
|        | 6960189 | Furin           | 2.6493952 |
|        | 1430035 | Ralgps1         | 2.6412253 |
| 12802  | 6590196 | Cnr2            | 2.640367  |
| 224024 | 3170326 | Scarf2          | 2.6393394 |
|        | 5690382 | Pdk3            | 2.6149094 |
| 76073  | 4150682 | 0610009F02Rik   | 2.6102462 |
| 20937  | 1090328 | Suv39h1         | 2.6051476 |
| 13040  | 4200646 | Ctss            | 2.6043124 |
|        | 610661  | Tnfsf13b        | 2.601095  |
| 27215  | 1780681 | Azi2            | 2.5979638 |
|        | 7040202 | Bcl2a1d         | 2.5971258 |

|        |         |               |           |
|--------|---------|---------------|-----------|
|        | 6840059 | Tnfsf13b      | 2.5898952 |
| 68294  | 4890162 | 0610009O03Rik | 2.5799522 |
|        | 3520577 | 0610007L01Rik | 2.5767152 |
| 19157  | 3180196 | Pscd1         | 2.5739574 |
| 28146  | 5220142 | D3Ucla1       | 2.5719132 |
|        | 2650097 | 4930553M18Rik | 2.5712993 |
| 68758  | 4480368 | Wbscr21       | 2.5701778 |
|        | 2260010 | Psat1         | 2.570035  |
|        | 4590470 | Ppp3cc        | 2.5683107 |
|        | 6450369 | 0610009D07Rik | 2.5540922 |
| 432486 | 3310438 | Gnptab        | 2.5332212 |
| 15944  | 7550324 | Irgm          | 2.5294955 |
| 13011  | 3310189 | Cst7          | 2.528709  |
|        | 6060228 | 1110038B12Rik | 2.525459  |
| 210808 | 1570703 | 9030625A04Rik | 2.5197856 |
| 26562  | 2760634 | Ncdn          | 2.515578  |
| 53415  | 2340382 | Htatip2       | 2.5073245 |
|        | 4760189 | C430026P20Rik | 2.5040426 |
| 70827  | 730092  | Trak2         | 2.4924257 |
| 212503 | 5270022 | Paox          | 2.4877808 |
| 23853  | 4810543 | Def6          | 2.4768178 |
| 19229  | 4200088 | Ptk2b         | 2.4429646 |
|        | 60026   | Sgcb          | 2.4420743 |
| 108670 | 2760274 | 2310046K10Rik | 2.43045   |
|        | 3940129 | Mela          | 2.4278595 |
| 93747  | 3450162 | Echs1         | 2.409149  |
|        | 6860307 | LOC380692     | 2.4012818 |
|        | 3360402 | Max           | 2.3927464 |
|        | 2710746 | Polg          | 2.3817697 |
| 83704  | 4220112 | Slc12a9       | 2.3665092 |
|        | 6840672 | U2af1-rs2     | 2.3641603 |
|        | 2370523 | Ube2h         | 2.3561199 |
|        | 6620440 | Hnrpab        | 2.352667  |
|        | 6840598 | 0610039J04Rik | 2.346254  |
|        | 2100497 | Psme2b        | 2.3393486 |
| 380711 | 1440040 | Garnl4        | 2.3377824 |
|        | 1260612 | Perld1        | 2.3355196 |
|        | 3830025 | Nme2          | 2.3298802 |
|        | 6200202 | BC021438      | 2.3043249 |
|        | 6590280 | Panx1         | 2.2970867 |
| 66595  | 6270377 | 1100001A21Rik | 2.2956433 |
| 29806  | 4810520 | Limd1         | 2.2902987 |
|        | 130097  | Bcl2a1b       | 2.2734125 |
|        | 4920598 | Pik3ap1       | 2.269826  |
|        | 1850500 | LOC194905     | 2.2696452 |
|        | 770403  | LOC382063     | 2.2688954 |
|        | 290300  | Wrd43         | 2.2679827 |
|        | 3850609 | Jak3          | 2.2609313 |
| 66394  | 3420477 | Nosip         | 2.2598019 |
| 66083  | 5090195 | Setd6         | 2.256369  |
| 226442 | 2070026 | Zfp281        | 2.2538438 |

|        |         |               |            |
|--------|---------|---------------|------------|
|        | 1440142 | 4931406P16Rik | 2.2513561  |
|        | 3850484 | LOC208055     | 2.247299   |
| 103551 | 540398  | E130012A19Rik | 2.2455714  |
|        | 1410646 | Ube2h         | 2.2329316  |
| 66940  | 1260673 | Scotin        | 2.2156405  |
|        | 3610482 | 2810457M08Rik | 2.2033515  |
|        | 7150192 | LOC228790     | 2.198152   |
|        | 1940594 | Ssh3          | 2.197547   |
|        | 3120632 | Galns         | 2.1928034  |
|        | 2370026 | Pkib          | 2.181093   |
|        | 2710753 | LOC382020     | 2.1746008  |
|        | 3800202 | LOC226574     | 2.1665533  |
| 17069  | 6550376 | Ly6e          | 2.1643107  |
| 15466  | 6020594 | Hrh2          | 2.1578815  |
| 245945 | 6270243 | BC013481      | 2.1529098  |
| 100756 | 430754  | Usp30         | 2.141526   |
| 66356  | 650164  | 2310008H09Rik | 2.1321514  |
|        | 7100608 | 2310032D16Rik | 2.1287746  |
| 78416  | 430703  | Rnase6        | 2.116824   |
|        | 4040709 | Gtf2f1        | 2.1107438  |
| 381314 | 6590349 | 2010002H18Rik | 2.102973   |
| 80751  | 6100593 | Rnf34         | 2.0985696  |
| 72140  | 3990255 | 2610507L03Rik | 2.0932763  |
|        | 2370279 | Phca          | 2.0904293  |
| 17535  | 5870193 | Mre11a        | 2.0789008  |
| 67186  | 240100  | Rplp2         | 2.0750055  |
| 76938  | 1410131 | Rbm17         | 2.06506    |
| 77889  | 5670440 | Lbh           | 2.0650373  |
| 23986  | 2690717 | Peci          | 2.0591457  |
| 67876  | 4830047 | Coq10b        | 2.0422976  |
|        | 2000356 | Ogfrl1        | 2.042041   |
| 66940  | 6960674 | Scotin        | 2.0203388  |
|        | 610717  | Ccnd3         | 2.0118794  |
|        | 5870367 | LOC268393     | 2.0075102  |
|        | 4230019 | 1110007C24Rik | -2.0117767 |
|        | 4230086 | Slc39a13      | -2.0121646 |
| 18120  | 5690167 | Mrpl49        | -2.0189633 |
|        | 6510482 | LOC382190     | -2.0354192 |
|        | 6100451 | Cln3          | -2.0360396 |
| 80292  | 5550681 | BC003332      | -2.0366354 |
|        | 3120431 | Gtf2h2        | -2.0418787 |
| 66111  | 4880619 | Tmed3         | -2.0429912 |
|        | 380246  | 5930418K15Rik | -2.0496378 |
|        | 6060370 | Btd6          | -2.0536826 |
| 67057  | 3170370 | Yaf2          | -2.0640652 |
| 236920 | 4860445 | Stard8        | -2.0643702 |
|        | 430551  | D6Wsu176e     | -2.067221  |
|        | 770056  | D6Wsu176e     | -2.0765975 |
| 76261  | 4920632 | 0610040J01Rik | -2.0806558 |
| 23971  | 2650678 | Papss1        | -2.0832865 |
| 78323  | 1430142 | 2310046O06Rik | -2.0980737 |

|        |         |               |            |
|--------|---------|---------------|------------|
| 619605 | 5700646 | 2810055E05Rik | -2.107333  |
|        | 5900575 | Il6st         | -2.117644  |
| 20822  | 3840626 | Trove2        | -2.1202006 |
| 12972  | 1240025 | Cryz          | -2.1241736 |
|        | 5270762 | 1700052N19Rik | -2.1262975 |
| 68520  | 4900484 | Zfyve21       | -2.1380923 |
| 68041  | 5130221 | Mid1ip1       | -2.1392205 |
| 76273  | 2940196 | Ndfip2        | -2.1429486 |
| 57376  | 6100577 | Smarce1       | -2.1507065 |
|        | 4920487 | Ckb           | -2.151927  |
| 30928  | 4780609 | Zfp238        | -2.159984  |
| 20648  | 4860114 | Snta1         | -2.1635106 |
|        | 1660397 | Acvr1         | -2.164739  |
| 11793  | 4810064 | Atg5          | -2.1695673 |
| 69780  | 1400523 | 1810031K02Rik | -2.1757936 |
| 228061 | 7320270 | Agps          | -2.175877  |
| 72519  | 5310605 | 2610319K07Rik | -2.18461   |
|        | 3710315 | Leprel2       | -2.203283  |
|        | 4810187 | Leftb         | -2.2098827 |
|        | 4060176 | A930033H14Rik | -2.2118201 |
|        | 5340551 | B130017I01Rik | -2.2139506 |
|        | 6940086 | Lman2l        | -2.2167177 |
| 14272  | 7210564 | Fnta          | -2.2289703 |
| 380967 | 3850064 | D15Ert405e    | -2.230131  |
| 18515  | 6060646 | Pbx2          | -2.232681  |
|        | 2850192 | Ppp1r2        | -2.2334585 |
| 68427  | 6860300 | Slc39a13      | -2.2340014 |
| 14870  | 1510035 | Gstp1         | -2.2349076 |
| 236920 | 1400601 | Stard8        | -2.2458577 |
| 71923  | 1980113 | 2310047M10Rik | -2.2475607 |
|        | 2570082 | 5730552M22Rik | -2.2484593 |
|        | 4210152 | 2810025M15Rik | -2.2563262 |
| 67839  | 5670360 | Gpsm1         | -2.2617304 |
|        | 6900228 | scl000392.1_7 | -2.2661433 |
| 23999  | 6520739 | Ptk9l         | -2.2671437 |
| 73274  | 2230296 | Gpbp1         | -2.269184  |
| 15387  | 6200673 | Hnrpk         | -2.2700613 |
|        | 3290202 | 1110008P08Rik | -2.272455  |
| 72057  | 1440735 | Phf10         | -2.273331  |
| 12359  | 4760356 | Cat           | -2.2858098 |
| 76687  | 3780717 | Spcs3         | -2.2870016 |
| 20430  | 1170129 | Cyfip1        | -2.2876    |
| 55978  | 3940575 | lft20         | -2.2899835 |
| 28081  | 5080372 | D11Wsu99e     | -2.2933621 |
| 17828  | 1110095 | Muted         | -2.2944536 |
| 211255 | 1850019 | Kbtbd7        | -2.3039458 |
| 76267  | 610274  | Fads1         | -2.3109221 |
|        | 2810739 | Zfp148        | -2.313825  |
| 192654 | 3170577 | Lypla3        | -2.3195877 |
| 71954  | 5360064 | 2400003N08Rik | -2.3287828 |
|        | 5130315 | Cltc          | -2.3421144 |

|        |         |               |            |
|--------|---------|---------------|------------|
| 57376  | 60563   | Smarce1       | -2.3481042 |
| 14088  | 4610484 | Fancc         | -2.3538246 |
| 78521  | 3850685 | B230219D22Rik | -2.3611653 |
|        | 4040017 | Evi5          | -2.3726807 |
|        | 2760241 | Prkab1        | -2.378881  |
|        | 2650215 | 4631434O19Rik | -2.3805685 |
|        | 5220528 | D930042A21Rik | -2.3824012 |
| 20947  | 4730392 | Swap70        | -2.393863  |
|        | 3610438 | 4933426L22Rik | -2.4030085 |
|        | 2900594 | 2810405I11Rik | -2.4036658 |
| 18624  | 3400551 | Pep4          | -2.4122674 |
| 15473  | 6180445 | Hrsp12        | -2.4244273 |
| 66469  | 3460270 | 2810405K02Rik | -2.4252157 |
| 78689  | 6840300 | Mak10         | -2.4264145 |
| 73172  | 7050523 | 3110037I16Rik | -2.4313061 |
| 23971  | 520243  | Papss1        | -2.4329743 |
| 68910  | 150241  | Zfp467        | -2.4463012 |
| 78255  | 4390128 | Ralgps2       | -2.4471638 |
|        | 5870253 | Calm2         | -2.4503381 |
| 69780  | 2470224 | 1810031K02Rik | -2.4525697 |
|        | 3890414 | 2700059D21Rik | -2.4542077 |
| 140580 | 6450021 | Elmo1         | -2.4616797 |
|        | 1340079 | A530090C09Rik | -2.4688375 |
|        | 6480450 | St13          | -2.4777985 |
| 214987 | 1990008 | 5830457O10Rik | -2.4842792 |
|        | 4490465 | Osgep         | -2.487559  |
| 66105  | 1190504 | Ube2d3        | -2.48968   |
| 52666  | 290348  | D10Ert610e    | -2.4947395 |
|        | 7200360 | Wdr18         | -2.499602  |
|        | 2360521 | AA792894      | -2.5012798 |
| 19645  | 10438   | Rb1           | -2.5042822 |
|        | 2070152 | Timp2         | -2.510775  |
|        | 3370068 | Apg5l         | -2.5122473 |
| 55980  | 60138   | Impa1         | -2.5291264 |
| 27045  | 4560739 | Nit1          | -2.5314307 |
|        | 2100598 | Btbd1         | -2.5404923 |
| 67863  | 7400521 | Slc25a11      | -2.5526302 |
|        | 3180368 | Ptpns1        | -2.5536509 |
| 74776  | 1450671 | Ppa2          | -2.5555077 |
|        | 5910239 | Eng           | -2.5858016 |
|        | 630327  | A930010I20Rik | -2.5868418 |
|        | 5340706 | BC030863      | -2.5897744 |
|        | 4120692 | Fahd1         | -2.5931497 |
|        | 780524  | Stx1a         | -2.5972373 |
| 56550  | 6060451 | Ube2d2        | -2.6011972 |
| 84094  | 3290239 | Plvap         | -2.6094868 |
|        | 5050136 | 2610528A11Rik | -2.611304  |
| 17126  | 4050274 | Smad2         | -2.6146965 |
|        | 7380291 | Numb          | -2.6151164 |
| 74776  | 4560220 | Ppa2          | -2.6270165 |
|        | 5490524 | 2010005O13Rik | -2.6374931 |

|        |         |                 |            |
|--------|---------|-----------------|------------|
|        | 6400377 | 2310005E10Rik   | -2.6377313 |
| 67608  | 5720564 | 4430402O11Rik   | -2.6542733 |
| 66904  | 3390020 | Pccb            | -2.6611152 |
| 71735  | 4230470 | 1200011O22Rik   | -2.66348   |
|        | 5270743 | Kctd12          | -2.6676826 |
| 70031  | 7330070 | Cmtm8           | -2.6703935 |
|        | 4150133 | Pdgfa           | -2.670513  |
| 241732 | 1090605 | Tspyl3          | -2.6713245 |
|        | 4280041 | Wrb             | -2.6732972 |
| 68151  | 7000465 | Gpr177          | -2.6764617 |
|        | 650291  | Calr            | -2.678618  |
| 71956  | 4490600 | Rnf135          | -2.6786501 |
| 74718  | 7040706 | Snx16           | -2.6896698 |
| 66308  | 6130255 | 2810021B07Rik   | -2.6928527 |
|        | 240202  | D930009C14Rik   | -2.6941142 |
| 66400  | 870598  | 2310045B01Rik   | -2.6964672 |
| 66637  | 2450427 | 5730449L18Rik   | -2.703721  |
| 76467  | 5960341 | Msrb2           | -2.7113369 |
|        | 6290309 | scl0003092.1_40 | -2.7136233 |
|        | 5550497 | Csnk1a1         | -2.7228372 |
| 23821  | 580446  | Bace1           | -2.7345595 |
| 27784  | 4200129 | Commd8          | -2.7348716 |
| 13733  | 2710110 | Emr1            | -2.7561786 |
| 14272  | 5960133 | Fnta            | -2.7586434 |
|        | 6650037 | Mic2l1          | -2.7588727 |
| 246710 | 6280170 | Rhobtb2         | -2.7637205 |
| 66902  | 5080594 | Mtap            | -2.769087  |
| 23954  | 4540523 | Nek3            | -2.772054  |
|        | 4610333 | Gcn1l1          | -2.7727063 |
|        | 7560112 | Zfp265          | -2.7745771 |
| 27055  | 5960070 | Fkbp9           | -2.7746134 |
| 52004  | 4180270 | D19Erttd144e    | -2.7884989 |
| 269023 | 7160025 | Zfp608          | -2.792831  |
| 12569  | 7210458 | Cdk5r1          | -2.7932775 |
|        | 1940041 | Kpna3           | -2.8001654 |
| 11409  | 270673  | Acads           | -2.8007205 |
| 64704  | 2850561 | Prss25          | -2.803913  |
|        | 2570008 | lvns1abp        | -2.813368  |
| 67213  | 6380044 | Cklfsf6         | -2.8320684 |
| 20444  | 5340056 | Siat5           | -2.8363976 |
| 12499  | 2320292 | Entpd5          | -2.8618767 |
| 13650  | 3840598 | Rhbdf1          | -2.8634522 |
| 72475  | 1820546 | Ssbp3           | -2.8683574 |
| 245522 | 6520474 | AK129302        | -2.8742294 |
| 108735 | 6480066 | Sft2d2          | -2.8751423 |
|        | 5220382 | B430210E12Rik   | -2.88001   |
|        | 130564  | Rab6            | -2.8820267 |
|        | 3390546 | Hnrph1          | -2.886617  |
| 27388  | 630017  | Ptdss2          | -2.8899515 |
| 56506  | 6840634 | Cib2            | -2.9111722 |
| 19280  | 6220692 | Ptpns           | -2.911873  |



|        |         |               |            |
|--------|---------|---------------|------------|
| 66530  | 1780168 | Ubx1          | -2.914949  |
| 12361  | 4890246 | Cask          | -2.9202726 |
| 209462 | 3400605 | Hace1         | -2.930056  |
| 72027  | 2470086 | Slc39a4       | -2.9422743 |
| 71041  | 20025   | Rnf134        | -2.9442163 |
| 71780  | 4670634 | Isyna1        | -2.9450667 |
|        | 5720612 | 0610039N19Rik | -2.9501693 |
| 76263  | 5270377 | Gstk1         | -2.9698012 |
| 109232 | 5340288 | C330023F11Rik | -2.9774535 |
| 70031  | 3830427 | Cmtm8         | -2.9799068 |
|        | 4250746 | Ankrd28       | -2.981395  |
|        | 780746  | A630054L15Rik | -2.987654  |
| 27360  | 5310091 | Add3          | -2.9970613 |
|        | 630470  | Mrpl35        | -3.0126646 |
|        | 160484  | Sv2a          | -3.0157974 |
| 66569  | 4280274 | 2610020H15Rik | -3.0198174 |
| 56530  | 7320301 | Tmem4         | -3.0233033 |
|        | 6590309 | Ube2a         | -3.0296497 |
| 240168 | 510010  | Rasgrp3       | -3.0461528 |
|        | 3190681 | Sv2a          | -3.0527527 |
| 78689  | 20112   | Mak10         | -3.0559282 |
| 26363  | 1510521 | Btd           | -3.071502  |
|        | 6510100 | E330027P06Rik | -3.08145   |
|        | 1940215 | 2700046G09Rik | -3.0843163 |
| 53861  | 5080259 | Zranb2        | -3.0993726 |
|        | 4290634 | Rapgef5       | -3.1028523 |
| 12577  | 4570451 | Cdkn1c        | -3.107184  |
| 213391 | 730138  | Rassf4        | -3.1087675 |
|        | 3400546 | Slc12a2       | -3.1105607 |
|        | 6860309 | B230104P22Rik | -3.118421  |
|        | 870079  | E230027K01Rik | -3.1235106 |
| 140580 | 3450678 | Elmo1         | -3.1268098 |
|        | 4830403 | 2210408O09Rik | -3.130469  |
| 21402  | 6900541 | Skp1a         | -3.13445   |
| 23885  | 1010521 | Gmcl1         | -3.1387613 |
| 13046  | 5090400 | Cugbp1        | -3.1415992 |
| 52668  | 160437  | D12Ert647e    | -3.148253  |
|        | 6400446 | AV028368      | -3.1506517 |
| 252972 | 2850154 | Tpcn1         | -3.151579  |
|        | 7100653 | 7420700D11Rik | -3.1547096 |
|        | 6370379 | Hexa          | -3.1561372 |
| 106861 | 150255  | Abhd3         | -3.1570005 |
| 30794  | 2940615 | Pdlim4        | -3.168153  |
|        | 6560167 | Numb          | -3.169945  |
| 234776 | 2510376 | BC060631      | -3.1972623 |
| 13476  | 730541  | Dp1           | -3.1981936 |
|        | 6250273 | Als2cr2       | -3.1985087 |
|        | 4040646 | Siat9         | -3.2029321 |
|        | 290017  | 9.33E+22      | -3.2035012 |
| 20383  | 1340040 | Sfrs3         | -3.2036316 |
|        | 6130142 | E330011I20Rik | -3.2205112 |

|        |         |                 |            |
|--------|---------|-----------------|------------|
|        | 1980129 | scl0001356.1_58 | -3.2223022 |
|        | 1230440 | Mef2c           | -3.2391024 |
|        | 2680253 | 1300007O09Rik   | -3.2432034 |
| 11737  | 1090142 | Anp32a          | -3.2469265 |
| 330050 | 1780615 | Al847670        | -3.248781  |
| 67416  | 6200630 | Armcx2          | -3.250545  |
| 71703  | 4570168 | Armcx3          | -3.2513294 |
|        | 6660750 | Fbxl19          | -3.2628348 |
| 18222  | 4780022 | Numb            | -3.2956693 |
|        | 6420750 | Sall2           | -3.3100755 |
| 70465  | 1990735 | Wdr77           | -3.3255696 |
| 13733  | 1030411 | Emr1            | -3.3382907 |
| 195522 | 6660626 | Zfp691          | -3.3391292 |
| 52668  | 1110280 | D12Ert647e      | -3.345007  |
| 54486  | 5390768 | Ptgds2          | -3.3513024 |
|        | 4830142 | Rapgef5         | -3.3555899 |
| 22325  | 4210333 | Vav2            | -3.366038  |
|        | 5220615 | Abl1            | -3.3906817 |
| 102545 | 460347  | Cmtm7           | -3.3966706 |
| 66355  | 670626  | Gmpr            | -3.4017186 |
|        | 2260553 | Rapgef5         | -3.4050438 |
| 14388  | 7200678 | Gab1            | -3.4175606 |
|        | 1190619 | Man2b2          | -3.4205914 |
|        | 2690451 | LOC384318       | -3.4400938 |
| 23945  | 2350451 | Mgll            | -3.4416885 |
| 22129  | 540202  | Ttc3            | -3.4477236 |
|        | 5080528 | 1600010D10Rik   | -3.457523  |
| 72759  | 6620195 | 2810439K08Rik   | -3.4591973 |
| 22129  | 580379  | Ttc3            | -3.4738548 |
|        | 360709  | 4933428I03Rik   | -3.4833777 |
| 52163  | 7100014 | Camk1           | -3.489203  |
|        | 1780156 | Maged1          | -3.4995856 |
|        | 2190093 | 2010005O13Rik   | -3.50607   |
| 56367  | 1850072 | Scoc            | -3.5504503 |
| 140580 | 4180403 | Elmo1           | -3.554041  |
|        | 2680243 | Gpr125          | -3.5548577 |
| 214987 | 7200041 | 5830457O10Rik   | -3.5779116 |
| 73847  | 1090228 | 5430432M24Rik   | -3.5780027 |
| 106952 | 6020255 | E030006K04Rik   | -3.5825481 |
|        | 20400   | B230339H12Rik   | -3.5993583 |
|        | 3780369 | B930007L02Rik   | -3.5994353 |
| 13046  | 5080132 | Cugbp1          | -3.6020002 |
|        | 3400747 | Igfbp4          | -3.6094816 |
|        | 2320390 | B430201A12Rik   | -3.6111147 |
|        | 4010544 | Slc35e3         | -3.6221392 |
|        | 3120706 | Bin1            | -3.6422768 |
|        | 50152   | Fbxo30          | -3.6539931 |
|        | 2650300 | Gfer            | -3.6877446 |
| 23885  | 3870300 | Gmcl1           | -3.7048757 |
|        | 2120356 | Myl2            | -3.7100601 |
| 217364 | 6980647 | D230014K01Rik   | -3.7123995 |

|        |         |               |            |
|--------|---------|---------------|------------|
| 105193 | 1710736 | Nhlrc1        | -3.7141573 |
|        | 6130040 | Ppp1r12a      | -3.7337284 |
| 67222  | 5560139 | Srfbp1        | -3.7413044 |
| 66953  | 6510500 | Cdca7         | -3.755155  |
|        | 6250593 | 1110064N10Rik | -3.7691076 |
| 233274 | 70463   | Siglech       | -3.7765267 |
|        | 7400632 | Fbxl19        | -3.7860851 |
| 56534  | 2940243 | Hspb3         | -3.808328  |
| 66922  | 4230142 | Rras2         | -3.811914  |
|        | 7560170 | A930029N17Rik | -3.8226185 |
|        | 4610653 | 1700081H05Rik | -3.8229976 |
|        | 6400017 | Hist1h2bc     | -3.8586414 |
| 60365  | 1710152 | Rbm8          | -3.878243  |
| 21812  | 3940184 | Tgfbr1        | -3.8912659 |
| 212276 | 2320187 | Zfp748        | -3.9107764 |
|        | 1240296 | Clstn1        | -3.9163566 |
| 216881 | 6250082 | BC030477      | -3.922851  |
| 67266  | 60601   | 2900024C23Rik | -3.928497  |
| 70178  | 50608   | 2210412D01Rik | -3.9330773 |
| 26365  | 1050465 | Ceacam1       | -3.9466677 |
|        | 1230243 | D030028A08Rik | -3.9510322 |
| 102545 | 1980768 | Cmtm7         | -3.9643934 |
|        | 6270270 | Spg20         | -3.9763305 |
|        | 5890059 | Epb4.9        | -3.9767656 |
| 20621  | 1030577 | Snn           | -3.9974792 |
|        | 990634  | 1700129L13Rik | -4.0077596 |
|        | 5890097 | Sema4b        | -4.0536036 |
|        | 6580100 | Spg20         | -4.0544896 |
| 207521 | 1300300 | Dtx4          | -4.070011  |
|        | 610377  | C430010P07Rik | -4.076873  |
| 60365  | 4900040 | Rbm8          | -4.083848  |
|        | 7510692 | C630025L14    | -4.090974  |
|        | 3460670 | Oxct1         | -4.0915565 |
| 56468  | 270678  | Socs5         | -4.126411  |
|        | 4070025 | Slc12a2       | -4.1331034 |
| 102545 | 6380326 | Cmtm7         | -4.1434383 |
| 54632  | 130431  | Ftsj          | -4.1470785 |
|        | 4850747 | Eif4a2        | -4.164081  |
| 140580 | 3130600 | Elmo1         | -4.1640854 |
|        | 1170709 | D13Bwg1146e   | -4.164168  |
|        | 1010110 | Rab11a        | -4.1652327 |
|        | 4830220 | Epn2          | -4.1706996 |
| 235584 | 4540056 | Dusp7         | -4.1761136 |
| 212627 | 6770386 | Prpsap2       | -4.223417  |
| 331474 | 360608  | Rgag4         | -4.229003  |
| 23945  | 5310328 | Mgll          | -4.2589927 |
|        | 5690156 | Pes1          | -4.2597136 |
| 320736 | 5420445 | E130203B14Rik | -4.2615814 |
| 207521 | 130102  | Dtx4          | -4.2827873 |
| 17179  | 3440397 | Matk          | -4.2866797 |
| 78408  | 4920079 | 2900046G09Rik | -4.3402166 |

|        |         |                 |            |
|--------|---------|-----------------|------------|
|        | 150707  | 9530051E16Rik   | -4.355264  |
|        | 5870044 | 1110012N22Rik   | -4.3558745 |
| 20363  | 380133  | Sepp1           | -4.3608804 |
| 16430  | 1410196 | Itm1            | -4.3746743 |
|        | 4040632 | Ube2n           | -4.4141397 |
| 76416  | 6280270 | 1700022C21Rik   | -4.423207  |
| 329165 | 70746   | Abi2            | -4.446644  |
| 73710  | 1030133 | Tubb2b          | -4.4905324 |
| 30948  | 290242  | Bin1            | -4.50301   |
| 329165 | 6060441 | Abi2            | -4.5087266 |
|        | 5860608 | Rbbp4           | -4.5126247 |
|        | 1990138 | C130085G02Rik   | -4.5133095 |
|        | 3930093 | LOC232532       | -4.5423408 |
|        | 2260280 | Epn2            | -4.5589848 |
|        | 3310368 | Endogl1         | -4.5623093 |
|        | 4830709 | scl0002124.1_39 | -4.5625286 |
| 60322  | 4640278 | Chst7           | -4.5738378 |
| 72324  | 7570619 | Plxdc1          | -4.5834675 |
|        | 5560711 | 1200006F02Rik   | -4.604957  |
| 109711 | 4590136 | Actn1           | -4.625583  |
| 140580 | 5220554 | Elmo1           | -4.6484623 |
|        | 6770450 | Slc37a1         | -4.688916  |
|        | 2490575 | Serpinf1        | -4.6989546 |
| 59030  | 7200068 | Mkks            | -4.7009463 |
| 21349  | 1580035 | Tal1            | -4.7079153 |
| 18074  | 6370035 | Nid2            | -4.7721443 |
|        | 3120403 | F9              | -4.7821255 |
| 58245  | 5260082 | Gpr180          | -4.8360868 |
| 70237  | 460239  | Bhlhb9          | -4.846374  |
|        | 2450343 | Hpgd            | -4.854795  |
|        | 2940064 | LOC384853       | -4.8811364 |
|        | 1710300 | 5730590C14Rik   | -4.9243293 |
|        | 2630204 | Lbx2h           | -4.9323206 |
| 13733  | 7610372 | Emr1            | -4.937399  |
| 70839  | 1440050 | P2ry12          | -4.956196  |
|        | 3710209 | A2bp1           | -4.9656987 |
|        | 1110048 | Unc13b          | -4.9703794 |
|        | 6330086 | Leprel1         | -4.977682  |
|        | 7650273 | Hist1h1c        | -4.977993  |
| 12745  | 6980487 | Clgn            | -5.025053  |
| 223332 | 4610131 | C130037N17Rik   | -5.031054  |
| 319625 | 5720022 | Galm            | -5.0535674 |
|        | 6180632 | Fts             | -5.0552464 |
| 99326  | 4610288 | Garnl3          | -5.1180186 |
|        | 1090671 | Inpp4b          | -5.166094  |
| 68092  | 1230615 | Ncbp2           | -5.19578   |
| 319845 | 160291  | E130103I17Rik   | -5.2187443 |
| 66870  | 3370010 | Serbp1          | -5.2325816 |
|        | 1090397 | LOC380658       | -5.2683644 |
| 56807  | 7160372 | Scamp5          | -5.32189   |
|        | 6100520 | Cnm2            | -5.323761  |

|        |         |                       |            |
|--------|---------|-----------------------|------------|
|        | 3830524 | Magee1                | -5.364121  |
|        | 2450450 | LOC240261             | -5.3735914 |
|        | 20615   | Ppm1l                 | -5.3815427 |
|        | 5050066 | Ppm1l                 | -5.4096684 |
| 70652  | 20706   | 5730537D05Rik         | -5.433914  |
|        | 4810328 | Nrarp                 | -5.4685273 |
| 52637  | 110576  | D10Ert214e            | -5.472129  |
|        | 450370  | 4921509E05Rik         | -5.592003  |
| 93872  | 4010709 | Pcdhb1                | -5.628004  |
| 14697  | 6760750 | Gnb5                  | -5.689111  |
|        | 2340670 | 4921506I22Rik         | -5.7023134 |
|        | 5570132 | Ppm1l                 | -5.739198  |
| 56807  | 3850280 | Scamp5                | -5.7585073 |
|        | 3180300 | 4930404K22Rik         | -5.7709937 |
|        | 3710750 | BC027174              | -5.8164263 |
|        | 5860338 | 1700008D07Rik         | -5.882566  |
|        | 1110035 | Rab3ip                | -5.9651823 |
|        | 5690092 | Ak1                   | -6.0053205 |
|        | 1340619 | Ly6g6d                | -6.0373063 |
| 80884  | 360437  | Maged2                | -6.0998144 |
| 72865  | 4730168 | Cxx1c                 | -6.1466784 |
| 13803  | 6290689 | Enc1                  | -6.2557416 |
| 71827  | 4250239 | Lrrc34                | -6.375852  |
| 83679  | 6100612 | Pde4dip               | -6.3914156 |
| 207278 | 5260079 | Fchsd2                | -6.4057755 |
| 18451  | 5870040 | P4ha1                 | -6.4596953 |
| 55936  | 4060291 | Ctps2                 | -6.559136  |
| 20621  | 4860373 | Snn                   | -6.7751412 |
|        | 20739   | 2310040G24Rik         | -6.8034964 |
| 320705 | 6290403 | B230209C24Rik         | -6.8057814 |
| 20363  | 7160603 | Sepp1                 | -6.8085084 |
| 13641  | 1400152 | Efnb1                 | -6.829031  |
|        | 3870392 | Bglap1                | -6.8421664 |
| 80891  | 6130746 | Msr2                  | -6.8579535 |
| 654812 | 1980605 | Angptl7               | -6.869553  |
|        | 3940193 | LOC238678             | -6.8943324 |
| 18074  | 5960066 | Nid2                  | -6.9113126 |
| 56504  | 20465   | Stk23                 | -6.9174123 |
|        | 670440  | Rgs2                  | -7.050744  |
|        | 1570022 | Bcl11a                | -7.165982  |
| 67374  | 1470215 | Jam2                  | -7.182305  |
|        | 3460021 | Abcf3                 | -7.214351  |
|        | 1690255 | 1700017I11Rik         | -7.242002  |
|        | 7210373 | A630002K24            | -7.3159823 |
|        | 5900356 | scl000028.1_0_REVCOMP | -7.346039  |
| 12153  | 6940278 | Bmp1                  | -7.4499125 |
| 66082  | 6200240 | Abhd6                 | -7.4518394 |
|        | 2190161 | 1700110I01Rik         | -7.5083895 |
| 53951  | 6590189 | 2310002B06Rik         | -7.625136  |
|        | 4540221 | Fscn1                 | -7.631894  |

|        |         |                   |            |
|--------|---------|-------------------|------------|
| 23945  | 6660719 | Mgll              | -7.6540003 |
| 320333 | 1580386 | D830030K20Rik     | -7.688714  |
|        | 7330445 | LOC381755         | -7.7194457 |
|        | 5270195 | P4ha1             | -7.729238  |
|        | 1410634 | Gtf2h2            | -7.797749  |
|        | 290561  | scl0002702.1_3805 | -7.8292947 |
| 22696  | 2000307 | Zfp37             | -7.8382883 |
|        | 1850315 | Sox4              | -8.068424  |
| 67425  | 7400707 | Eps8l1            | -8.17454   |
| 225027 | 5700541 | Sfrs7             | -8.2021475 |
| 27528  | 7040243 | DOH4S114          | -8.293479  |
|        | 270601  | 1700110I01Rik     | -8.297816  |
|        | 450091  | Msr2              | -8.450049  |
| 74211  | 7560201 | 1700017B05Rik     | -8.622992  |
|        | 6650477 | Ian6              | -8.728201  |
|        | 1940040 | 4931406O17Rik     | -8.931486  |
|        | 2630364 | 1110021L09Rik     | -9.062013  |
| 68947  | 4590113 | Chst8             | -9.073578  |
| 52331  | 1430129 | D5Erttd593e       | -9.181482  |
|        | 830736  | Adra2a            | -9.278435  |
|        | 7570162 | scl0001297.1_42   | -9.2978735 |
|        | 4810132 | Lrba              | -9.499885  |
|        | 3120129 | Gprasp1           | -9.513486  |
|        | 3140369 | LOC228238         | -9.56494   |
| 230766 | 3120402 | BC030183          | -9.658654  |
|        | 110465  | 1700094J05Rik     | -9.668645  |
|        | 5570519 | Usp48             | -9.808927  |
|        | 580259  | Catnd2            | -9.864736  |
| 330217 | 6330068 | Gal3st4           | -9.962367  |
|        | 7150327 | 2610203C22Rik     | -10.233364 |
|        | 5810576 | Cxcr3             | -10.400648 |
| 72948  | 2140431 | 2900041A09Rik     | -10.529157 |
|        | 1410673 | Ppm1e             | -10.640428 |
|        | 6250673 | 2310047D07Rik     | -10.701365 |
|        | 4880762 | 6430524C05Rik     | -10.721642 |
| 117590 | 6400360 | Asb10             | -10.909695 |
|        | 780035  | Gprasp1           | -10.910683 |
| 21812  | 4640750 | Tgfbr1            | -10.939467 |
|        | 5690403 | Gadl1             | -10.949318 |
| 237052 | 4570468 | Tceal1            | -11.205791 |
| 66642  | 1820019 | Ctnnbl1           | -11.367433 |
| 69032  | 2340255 | Lyzl4             | -11.442951 |
|        | 3990228 | 9330161C17Rik     | -11.486881 |
|        | 7560554 | Jam3              | -11.701891 |
| 237052 | 840762  | Tceal1            | -11.706359 |
| 76722  | 430427  | Ckmt2             | -11.811412 |
| 67247  | 70468   | 2810484M10Rik     | -11.849452 |
| 18670  | 7210136 | Abcb4             | -11.868487 |
|        | 7050661 | 6330419J24Rik     | -12.172128 |
| 23890  | 7510333 | Gpr34             | -12.325673 |
|        | 4200164 | LOC381900         | -12.328836 |

|        |         |               |             |
|--------|---------|---------------|-------------|
| 407831 | 5360750 | BC054438      | -12.389819  |
| 14772  | 650692  | Gprk2l        | -12.399905  |
| 117589 | 1440477 | Asb7          | -12.550074  |
|        | 360484  | LOC239426     | -12.7721615 |
| 23890  | 3290240 | Gpr34         | -12.972253  |
| 54368  | 4280414 | Gp9           | -13.196512  |
| 70652  | 2490291 | 5730537D05Rik | -13.570747  |
|        | 3170021 | Tef           | -13.592133  |
| 65256  | 2850398 | Asb2          | -13.979256  |
|        | 4920491 | 6720458D17Rik | -14.01315   |
| 210741 | 6060242 | Kcnk12        | -14.159665  |
|        | 6220142 | Khdrbs3       | -14.17978   |
|        | 3450333 | Mapk8ip3      | -14.474054  |
|        | 2630494 | LOC382527     | -14.649677  |
| 67441  | 2030474 | 0610042E07Rik | -15.096732  |
|        | 1980746 | 6530406P05Rik | -15.458729  |
| 14137  | 3710358 | Fdft1         | -15.805224  |
|        | 520692  | E130115E03Rik | -15.991478  |
| 21835  | 6580403 | Thrsp         | -16.040825  |
|        | 6420537 | Aebp2         | -16.571474  |
|        | 2320619 | Elavl4        | -16.829538  |
|        | 1740091 | Pfcp          | -17.21422   |
|        | 7570390 | 9330175B01Rik | -17.275976  |
|        | 2120576 | mtDNA_ND6     | -17.915466  |
|        | 840148  | Sncaip        | -17.957117  |
|        | 3180452 | Zfp286        | -18.37543   |
|        | 670072  | Hspa5bp1      | -18.59753   |
| 109245 | 2690524 | 9430028I06Rik | -18.738008  |
|        | 4060270 | 2410078J06Rik | -18.797136  |
| 13885  | 4010563 | Esd           | -21.67733   |
| 22268  | 4880433 | Upk1b         | -21.744942  |
|        | 4040711 | LOC380876     | -22.142038  |
| 14204  | 6020224 | Il4i1         | -22.431118  |
|        | 2850347 | Lt1           | -24.978193  |
|        | 3140259 | 9030205A07Rik | -25.373133  |
| 241556 | 6180524 | 6720430O15    | -28.405855  |
|        | 3140397 | Gprasp2       | -31.16595   |
|        | 6660202 | 3526401B18Rik | -32.624947  |
| 21935  | 2940482 | Tnfrsf17      | -34.03184   |
| 67374  | 7570673 | Jam2          | -34.592003  |
|        | 780202  | D030035F05Rik | -35.15158   |
| 214968 | 6510270 | Sema6d        | -35.219437  |
| 80877  | 5220333 | Lrba          | -36.416218  |
| 239157 | 7040386 | Pnma2         | -43.546467  |
|        | 5810598 | Col6a3        | -52.25674   |
|        | 4200546 | Adcy8         | -64.21477   |
| 241556 | 2320035 | 6720430O15    | -65.34124   |
| 271127 | 3130450 | Adamts16      | -69.13274   |
|        | 5080296 | 2610042G18Rik | -81.00859   |
| 16644  | 4290521 | Kng1          | -92.20496   |

Supplementary table S3: Upregulated genes at d5 and d7

| Entrez Gene ID | ProbeID | Gene symbol   | Fold change vs naïve day 5 | Fold change vs naïve day 7 |
|----------------|---------|---------------|----------------------------|----------------------------|
|                | 1050092 | Serpina3g     | 75.3                       | 1178.3                     |
|                | 3170487 | F730004D16Rik | 29.9                       | 624.3                      |
|                | 540647  | Cd69          | 42.9                       | 414.2                      |
| 18175          | 3170047 | Nrap          | 160.5                      | 394.1                      |
|                | 4730246 | LOC226690     | 244.6                      | 378.6                      |
| 231655         | 4780253 | Oasl1         | 562.7                      | 376.1                      |
| 246728         | 3060450 | Oas2          | 232.1                      | 246.0                      |
|                | 7400528 | Ifi205        | 27.7                       | 243.7                      |
|                | 6450259 | Ifi205        | 52.4                       | 234.7                      |
| 231655         | 240187  | Oasl1         | 159.2                      | 199.6                      |
|                | 60368   | Slp           | 67.9                       | 189.2                      |
| 14469          | 6860600 | Gbp2          | 19.0                       | 185.8                      |
| 68713          | 4010019 | Ifitm1        | 66.2                       | 181.2                      |
|                | 130348  | Slp           | 66.9                       | 175.1                      |
|                | 5820709 | LOC240921     | 14.1                       | 157.6                      |
|                | 10598   | Cxcl9         | 14.7                       | 137.2                      |
|                | 2190133 | Ifi205        | 48.8                       | 123.9                      |
| 70218          | 2680010 | 3000004C01Rik | 354.9                      | 123.5                      |
|                | 4810184 | Dlm1-pending  | 25.5                       | 122.8                      |
|                | 580470  | Tnfrsf5       | 40.8                       | 122.4                      |
| 20555          | 3520746 | Slfn1         | 34.8                       | 121.5                      |
| 58185          | 5560474 | 2510004L01Rik | 25.7                       | 120.9                      |
|                | 4570458 | Sn            | 99.4                       | 116.4                      |
| 231655         | 840259  | Oasl1         | 44.3                       | 113.6                      |
|                | 3840575 | Cd244         | 21.6                       | 113.0                      |
|                | 6590653 | Irf7          | 69.8                       | 101.7                      |
| 12268          | 6510113 | C4            | 40.4                       | 93.6                       |
|                | 2810612 | Birc5         | 391.3                      | 90.8                       |
| 15958          | 5270398 | Ifit2         | 19.8                       | 78.7                       |
|                | 2190164 | Ccnb1         | 236.3                      | 77.8                       |
| 12268          | 7510243 | C4            | 36.3                       | 77.4                       |
| 15953          | 1090139 | Ifi47         | 9.2                        | 73.7                       |
| 15958          | 360041  | Ifit2         | 10.6                       | 72.5                       |
| 15951          | 7550093 | Ifi204        | 28.7                       | 68.8                       |
|                | 6020487 | Cyp4f18       | 13.4                       | 68.1                       |
|                | 3780474 | 9930016I07Rik | 28.0                       | 66.9                       |
| 231507         | 5860243 | Plac8         | 53.2                       | 63.8                       |
|                | 1500446 | Cdca8         | 103.0                      | 58.5                       |
| 70218          | 1710368 | 3000004C01Rik | 275.6                      | 57.6                       |
|                | 6420170 | BC006779      | 64.2                       | 54.9                       |
| 16571          | 6660050 | Kif4          | 287.9                      | 53.2                       |
| 229003         | 450706  | BC006779      | 49.1                       | 52.5                       |
| 68713          | 5960577 | Ifitm1        | 30.0                       | 51.5                       |
|                | 160041  | Mmp25         | 19.2                       | 50.1                       |
|                | 430202  | Top2a         | 63.5                       | 49.0                       |
|                | 2190215 | Cxcl10        | 9.6                        | 47.9                       |



|        |         |               |       |      |
|--------|---------|---------------|-------|------|
|        | 1240538 | P2ry14        | 26.3  | 46.2 |
|        | 7400215 | Birc5         | 169.7 | 44.0 |
|        | 2630066 | Ckap2         | 175.8 | 43.7 |
| 219131 | 6660327 | Phf11         | 19.6  | 43.6 |
|        | 3290292 | Mx1           | 8.2   | 42.2 |
| 102084 | 520040  | Al451557      | 17.5  | 42.0 |
| 219131 | 1340193 | Phf11         | 20.8  | 40.5 |
| 15959  | 3460504 | Ifit3         | 23.4  | 40.5 |
| 15945  | 3140209 | Cxcl10        | 13.4  | 39.1 |
| 14469  | 1400041 | Gbp2          | 10.1  | 37.9 |
| 19340  | 1470278 | Rab3d         | 6.1   | 37.3 |
| 18610  | 3610332 | Pdyn          | 9.0   | 37.0 |
| 66141  | 3840292 | Ifitm3        | 17.2  | 34.7 |
|        | 3830328 | Cdc25c        | 81.8  | 34.7 |
| 12263  | 4210470 | C2            | 16.7  | 34.5 |
| 23962  | 7050014 | Oasl2         | 108.4 | 34.5 |
|        | 3840523 | Kif23         | 46.2  | 33.9 |
|        | 1410554 | Tyki          | 18.9  | 33.6 |
|        | 6580379 | P2ry14        | 15.1  | 33.4 |
| 71819  | 4850079 | Kif23         | 140.2 | 33.4 |
| 23962  | 4830010 | Oasl2         | 20.3  | 32.6 |
|        | 1240446 | Birc5         | 111.3 | 31.8 |
| 58203  | 1580634 | Zbp1          | 20.9  | 31.2 |
| 217430 | 5890523 | Pqlc3         | 4.3   | 31.0 |
|        | 540438  | LOC328752     | 31.4  | 29.6 |
|        | 5820128 | 0610037M15Rik | 24.2  | 28.8 |
| 15959  | 7510020 | Ifit3         | 13.4  | 28.3 |
| 20684  | 1170110 | Sp100         | 24.8  | 27.4 |
|        | 2850717 | H2-Q8         | 34.9  | 27.3 |
|        | 4830543 | 2310061N23Rik | 19.7  | 26.7 |
| 21822  | 3890121 | Tgtp          | 31.0  | 26.4 |
|        | 3940242 | AA175286      | 10.4  | 26.3 |
| 14190  | 2340242 | Fgl2          | 14.1  | 26.1 |
| 53606  | 460221  | G1p2          | 16.1  | 24.6 |
| 227659 | 7400286 | Slc2a6        | 6.6   | 24.0 |
| 228421 | 3180164 | Kif18a        | 92.3  | 23.6 |
|        | 6280521 | A530060O05Rik | 4.8   | 23.2 |
| 233406 | 780475  | Prc1          | 49.9  | 22.8 |
| 73804  | 1780543 | Kif2c         | 16.3  | 22.5 |
| 80876  | 840349  | Ifitm2        | 7.5   | 22.1 |
|        | 1090647 | 9830148G24Rik | 12.4  | 21.1 |
| 24110  | 4610139 | Usp18         | 25.0  | 20.8 |
|        | 2490653 | LOC240327     | 15.7  | 20.4 |
|        | 7040475 | 2610019I03Rik | 121.1 | 20.1 |
| 67775  | 2760577 | Rtp4          | 14.0  | 20.0 |
| 59027  | 2750189 | Pbef1         | 11.0  | 19.8 |
| 21853  | 160703  | Timeless      | 30.2  | 19.3 |
|        | 2230538 | Cd44          | 5.4   | 18.1 |
|        | 3890682 | 2610036L11Rik | 18.8  | 18.0 |
|        | 2650703 | 9830002L24Rik | 48.7  | 17.9 |

|        |         |               |      |      |
|--------|---------|---------------|------|------|
| 74107  | 3710050 | 1200008O12Rik | 67.9 | 17.5 |
| 12268  | 1010632 | C4            | 4.7  | 17.4 |
|        | 2350095 | Bub1b         | 29.0 | 17.3 |
| 15019  | 2750128 | H2-Q8         | 26.3 | 17.2 |
| 24110  | 2490452 | Usp18         | 16.8 | 16.9 |
| 327957 | 1190477 | A430084P05Rik | 3.4  | 16.3 |
| 14793  | 1050170 | Cdca3         | 42.6 | 15.6 |
|        | 4040095 | H2-Q6         | 9.0  | 15.6 |
| 20847  | 6220594 | Stat2         | 7.9  | 15.2 |
| 24110  | 1580528 | Usp18         | 12.4 | 15.2 |
|        | 1400220 | LOC215405     | 10.4 | 14.7 |
| 23960  | 3890328 | Oas1g         | 19.5 | 14.7 |
| 23960  | 130598  | Oas1g         | 29.2 | 14.2 |
|        | 4850689 | A130019H11Rik | 6.7  | 14.2 |
| 19200  | 2360554 | Pstpip1       | 7.0  | 14.0 |
| 60533  | 3870561 | Pdcd1lg1      | 2.0  | 13.7 |
| 107995 | 4610722 | Cdc20         | 25.5 | 13.6 |
|        | 1090382 | Cdkn3         | 18.9 | 13.4 |
| 110454 | 1690187 | Ly6a          | 17.3 | 13.1 |
| 74747  | 130634  | Ddit4         | 14.5 | 13.0 |
|        | 6450634 | 1110017L21Rik | 49.2 | 12.9 |
| 70466  | 2450270 | 2610318C08Rik | 25.6 | 12.8 |
| 217946 | 4220139 | BC006933      | 11.2 | 12.7 |
| 246256 | 830632  | Fcrl3         | 4.7  | 12.4 |
|        | 5390088 | LOC327957     | 3.5  | 12.3 |
| 80861  | 6330592 | D11Lgp2e      | 7.7  | 11.9 |
|        | 520278  | Mx2           | 5.9  | 11.8 |
|        | 5720397 | D11Lgp2e      | 9.0  | 11.7 |
| 219132 | 2810040 | D14Erttd668e  | 5.6  | 11.2 |
|        | 6450598 | D11Lgp2e      | 9.3  | 11.1 |
| 547343 | 1400132 | LOC547343     | 4.7  | 10.9 |
| 15944  | 5820608 | Irgm          | 4.6  | 10.6 |
| 12575  | 2070377 | Cdkn1a        | 4.7  | 10.6 |
| 21354  | 5870093 | Tap1          | 4.6  | 10.6 |
|        | 6290592 | LOC226691     | 6.2  | 10.5 |
| 414801 | 2940612 | BC063749      | 3.2  | 9.9  |
|        | 1110445 | LOC380706     | 6.4  | 9.8  |
| 20556  | 4120307 | Slfn2         | 5.8  | 9.7  |
| 12575  | 7040491 | Cdkn1a        | 4.1  | 9.6  |
|        | 6760762 | Sdc3          | 5.9  | 9.3  |
| 12575  | 3130630 | Cdkn1a        | 3.4  | 9.1  |
| 667977 | 270367  | H2-gs17       | 6.5  | 8.9  |
| 219132 | 520053  | D14Erttd668e  | 4.5  | 8.9  |
| 22021  | 2120463 | Tpst1         | 4.3  | 8.7  |
|        | 3140446 | 2310020F24Rik | 3.5  | 8.6  |
| 56045  | 3190577 | Samhd1        | 2.3  | 8.3  |
| 26362  | 7100577 | Axl           | 3.6  | 8.3  |
| 12257  | 6270709 | Tspo          | 4.2  | 7.8  |
|        | 160463  | Lgals3bp      | 4.3  | 7.7  |
| 12257  | 4670544 | Tspo          | 5.3  | 7.6  |

|        |         |               |      |     |
|--------|---------|---------------|------|-----|
| 12257  | 2760544 | Tspo          | 4.8  | 7.6 |
|        | 7200519 | Cenpa         | 11.7 | 7.6 |
|        | 2510333 | Ccl12         | 4.3  | 7.6 |
|        | 50059   | AI504432      | 3.5  | 7.6 |
| 15024  | 870446  | H2-T10        | 5.5  | 7.1 |
| 110749 | 7200270 | Chaf1b        | 12.7 | 6.9 |
| 56628  | 1710768 | LOC56628      | 5.5  | 6.6 |
|        | 3400491 | Clic4         | 2.8  | 6.6 |
|        | 990615  | LOC239122     | 3.2  | 6.6 |
| 16362  | 3360138 | Irf1          | 2.1  | 6.4 |
| 14972  | 6280026 | H2-K1         | 4.6  | 6.4 |
|        | 6350114 | Ube2l6        | 8.3  | 6.3 |
|        | 6280221 | Sp100         | 7.8  | 6.3 |
|        | 5270475 | Trex1         | 3.4  | 6.1 |
|        | 6590215 | H2-T22        | 4.1  | 6.1 |
|        | 1990221 | Ccl12         | 2.7  | 6.0 |
| 630499 | 4640348 | EG630499      | 8.3  | 5.9 |
|        | 1470605 | D11Erttd759e  | 4.6  | 5.7 |
|        | 6350189 | Trex1         | 3.3  | 5.6 |
| 55932  | 60553   | Gbp4          | 2.8  | 5.6 |
| 16319  | 630634  | Incenp        | 7.8  | 5.5 |
|        | 2650326 | Pml           | 3.8  | 5.4 |
|        | 2970598 | Map3k8        | 2.3  | 5.3 |
|        | 6450682 | H2-L          | 3.3  | 5.3 |
|        | 6250600 | Cdkn2d        | 4.7  | 5.3 |
| 55932  | 1690475 | Gbp4          | 3.4  | 5.2 |
| 74137  | 1770592 | 1200013B22Rik | 2.6  | 5.2 |
|        | 830537  | LOC269515     | 5.2  | 5.1 |
| 15018  | 6940386 | H2-Q7         | 3.9  | 4.9 |
|        | 6760390 | H2-L          | 3.0  | 4.6 |
| 15013  | 5720048 | H2-Q2         | 3.6  | 4.6 |
|        | 380215  | Tor3a         | 2.1  | 4.5 |
| 56417  | 1780154 | Adar          | 2.9  | 4.4 |
|        | 2650754 | Ube2l6        | 8.1  | 4.4 |
|        | 780221  | H2-T9         | 3.3  | 4.3 |
| 243771 | 1340050 | Zc3hdc1       | 3.1  | 4.3 |
| 14964  | 4060735 | H2-D1         | 2.1  | 4.2 |
|        | 1780452 | Fbxw17        | 3.0  | 4.2 |
|        | 4490239 | AI481105      | 2.2  | 4.2 |
|        | 2230731 | H2-T17        | 3.4  | 4.2 |
| 15040  | 4010154 | H2-T23        | 2.6  | 4.1 |
|        | 3780736 | H2-K1         | 3.3  | 4.0 |
|        | 10167   | LOC56628      | 2.6  | 4.0 |
| 380732 | 5960678 | Gm885         | 2.8  | 4.0 |
| 15040  | 7200100 | H2-T23        | 2.6  | 3.9 |
|        | 4120014 | Ifi35         | 2.8  | 3.8 |
| 547253 | 2970521 | Parp14        | 3.4  | 3.7 |
|        | 2490142 | Ddx58         | 3.2  | 3.7 |
|        | 4730367 | Ifi30         | 3.2  | 3.4 |
| 12363  | 5290017 | Casp4         | 2.0  | 3.3 |

|        |         |               |     |     |
|--------|---------|---------------|-----|-----|
|        | 4290709 | Ifi30         | 2.8 | 3.3 |
|        | 1940338 | H2-M3         | 2.6 | 3.2 |
| 12517  | 5700528 | Cd72          | 6.3 | 3.2 |
|        | 10402   | Trim25        | 2.0 | 3.2 |
|        | 3460037 | Fen1          | 3.9 | 3.0 |
| 76073  | 4150682 | 0610009F02Rik | 2.2 | 2.6 |
| 108670 | 2760274 | 2310046K10Rik | 2.9 | 2.4 |
|        | 4920598 | Pik3ap1       | 2.1 | 2.3 |
| 17069  | 6550376 | Ly6e          | 2.5 | 2.2 |
| 72140  | 3990255 | 2610507L03Rik | 2.8 | 2.1 |

Supplementary table S4: Genes related to type I IFN signal

| Entrez Gene ID | ProbeID | Gene symbol | Fold change infected vs naïve day5 | Fold change infected vs naïve day7 |
|----------------|---------|-------------|------------------------------------|------------------------------------|
|                | 540647  | CD69        | 42.887672                          | 414.19824                          |
| 18175          | 3170047 | NRAP        | 160.49538                          | 394.08554                          |
| 231655         | 4780253 | Oasl1       | 562.70                             | 376.06052                          |
| 53608          | 7200025 | Map3k6      | <2                                 | 289.86234                          |
| 246728         | 3060450 | Oas2        | 232.05                             | 246.03413                          |
|                | 7400528 | Ifi205      | 52.38                              | 243.71439                          |
|                | 7560307 | IRG1        | <2                                 | 205.81625                          |
|                | 5340577 | XDH         | <2                                 | 191.93933                          |
| 14469          | 6860600 | Gbp2        | 18.95                              | 185.7916                           |
| 68713          | 4010019 | Ifitm1      | 66.18                              | 181.21935                          |
| 58217          | 4280504 | TREM1       | <2                                 | 141.02757                          |
|                | 10598   | Cxcl10      | 9.64                               | 137.17833                          |
| 20555          | 3520746 | Slfn1       | 34.845673                          | 121.54738                          |
|                | 6590653 | Irf7        | 69.78                              | 101.734886                         |
|                | 2810612 | BIRC5       | 391.27356                          | 90.84561                           |
| 18712          | 5860039 | PIM1        | <2                                 | 82.135574                          |
| 15951          | 3060554 | Ifi204      | 28.72                              | 79.68101                           |
| 15958          | 5270398 | Ifit2       | 19.83                              | 78.73005                           |
| 15953          | 1090139 | Ifi47       | 9.20                               | 73.65926                           |
| 231507         | 5860243 | PLAC8       | 53.18062                           | 63.796135                          |
| 16169          | 6400270 | IL15RA      | <2                                 | 57.363308                          |
| 15959          | 670670  | Ifit3       | 23.40                              | 48.86549                           |
|                | 4890689 | oas3        | <2                                 | 48.21454                           |
|                | 2190215 | Ctla2b      | <2                                 | 47.90023                           |
|                | 3290292 | Mx2         | 5.88                               | 42.183247                          |
| 14967          | 5050451 | H2-D4       | <2                                 | 39.440598                          |
| 16174          | 430446  | IL18RAP     | <2                                 | 38.17255                           |
| 57444          | 540411  | ISG20       | <2                                 | 35.519783                          |
| 66141          | 3840292 | Ifitm3      | 17.21                              | 34.70865                           |
| 23962          | 7050014 | Oasl2       | 108.35                             | 34.468334                          |
| 58203          | 1580634 | ZBP1        | 20.905413                          | 31.169638                          |
| 20304          | 1690768 | Ccl5        | <2                                 | 30.106688                          |
| 20684          | 1170110 | Sp100       | 24.784704                          | 27.380056                          |
|                | 2850717 | H2-Q8       | 26.31                              | 27.256311                          |
| 21822          | 3890121 | Tgtp        | 30.97                              | 26.397688                          |
| 14190          | 2340242 | FGL2        | 14.135186                          | 26.0683                            |
|                | 3420433 | IL12RB1     | <2                                 | 22.17348                           |
| 80876          | 840349  | Ifitm2      | 7.52                               | 22.117163                          |
| 20307          | 2480296 | Ccl8        | <2                                 | 21.234295                          |
| 24110          | 4610139 | Usp18       | 25.03                              | 20.82286                           |

|        |         |          |           |            |
|--------|---------|----------|-----------|------------|
| 67775  | 2760577 | RTP4     | 14.017168 | 20.039913  |
| 20847  | 6220594 | Stat2    | 7.85      | 15.200038  |
| 23960  | 3890328 | Oas1g    | 29.22     | 14.694639  |
| 23961  | 5550010 | Oas1b    | <2        | 14.200897  |
| 110454 | 1690187 | Ly6a     | 17.34583  | 13.109668  |
| 74747  | 130634  | DAXX     | <2        | 13.0422535 |
|        | 270193  | TNFSF13B | <2        | 12.3504    |
|        | 520278  | Mxd3     | 31.19     | 11.761493  |
| 12575  | 2070377 | CDKN1A   | 4.6513176 | 10.639942  |
| 21354  | 5870093 | TAP1     | 4.6280155 | 10.6270895 |
| 15016  | 6980075 | H2-Q5    | <2        | 9.767257   |
|        | 2490328 | PML      | 3.967862  | 9.696      |
| 20556  | 4120307 | Slfn2    | 5.795018  | 9.694468   |
| 667977 | 270367  | H2-gs17  | 6.54      | 8.926894   |
| 22021  | 2120463 | TPST1    | 4.3107605 | 8.743125   |
|        | 3290707 | TNFSF10  | <2        | 8.595983   |
| 21816  | 6270040 | TGM1     | <2        | 8.562749   |
| 56045  | 3190577 | SAMHD1   | 2.2548714 | 8.289592   |
| 26362  | 7100577 | AXL      | 3.6006958 | 8.283421   |
|        | 160463  | LGALS3BP | 4.325593  | 7.654424   |
|        | 2510333 | Ccl12    | 4.25      | 7.570478   |
| 15024  | 870446  | H2-T10   | 5.49      | 7.133779   |
| 16362  | 3360138 | Irf1     | 2.05      | 6.442806   |
| 14972  | 6280026 | H2-K1    | 3.32      | 6.434294   |
|        | 6350114 | UBE2L6   | 8.326761  | 6.2942476  |
|        | 5270475 | TREX1    | 3.4327192 | 6.081574   |
| 55932  | 60553   | Gbp4     | 3.35      | 5.602284   |
|        | 4150369 | CXCR3    | <2        | 5.3743515  |
|        | 2970598 | MAP3K8   | 2.3416035 | 5.332027   |
| 12046  | 3520735 | BCL2A1c  | <2        | 4.9259906  |
| 229900 | 6330692 | Gbp6     | <2        | 4.8516703  |
| 15018  | 6940386 | H2-Q7    | 3.88      | 4.8510656  |
| 78781  | 520600  | ZC3HAV1  | <2        | 4.673763   |
| 15013  | 5720048 | H2-Q2    | 3.62      | 4.595039   |
| 56417  | 1780154 | ADAR     | 3.6127155 | 4.4280953  |
| 15040  | 2350181 | H2-T23   | 2.60      | 4.328157   |
| 14964  | 4060735 | H2-D1    | 2.10      | 4.2292175  |
|        | 2940138 | CLSTN1   | <2        | 4.176888   |
| 12608  | 4230348 | CEACAM1  | <2        | 4.0453777  |
|        | 4120014 | Irf35    | 2.77      | 3.7912788  |
| 547253 | 2970521 | PARP14   | 3.3897967 | 3.7473128  |
|        | 2490142 | DDX58    | 3.204791  | 3.67007    |
|        | 4730367 | Irf30    | 3.20      | 3.4139001  |
| 12363  | 5290017 | CASP4    | 2.0126648 | 3.2787597  |

|        |         |         |            |            |
|--------|---------|---------|------------|------------|
| 19186  | 940674  | PSME1   | <2         | 2.9852178  |
|        | 5670398 | TRIM21  | <2         | 2.8592765  |
|        | 1110088 | APOBEC1 | <2         | 2.8509338  |
| 170743 | 1570487 | TLR7    | <2         | 2.7226593  |
| 17069  | 6550376 | LY6E    | 2.453925   | 2.1643107  |
|        | 610717  | CCND3   | <2         | 2.0118794  |
|        | 5900575 | IL6ST   | -2.3983967 | -2.117644  |
| 19645  | 10438   | RB1     | <2         | -2.5042822 |
|        | 2070152 | TIMP2   | <2         | -2.510775  |
| 27055  | 5960070 | FKBP9   | <2         | -2.7746134 |
|        | 3400747 | IGFBP4  | <2         | -3.6094816 |
|        | 1240296 | CEBPB   | <2         | -3.9163566 |
| 26365  | 1050465 | CDKN2D  | 4.655705   | -3.9466677 |
| 18074  | 5960066 | NID2    | <2         | -6.9113126 |
|        | 5810576 | Cxcl9   | 14.71      | -10.400648 |
| 21812  | 4640750 | TGFBR1  | <2         | -10.939467 |
| 14204  | 6020224 | IL4I1   | <2         | -22.431118 |
|        |         | lfitm6  | 10.41      | <2         |
|        |         | Mx1     | 8.18       | <2         |
|        |         | Stat1   | 5.55       | <2         |

Supplementary table S5: Combination of primers and probes for qRT-PCR.

| Gene symbol | Forward primer        | Reverse primer       | Probe |
|-------------|-----------------------|----------------------|-------|
| HPRT        | tcctcctcagaccgctttt   | cctggttcatcatcgcta   | 95    |
| Oasl1       | ggccaaccagtgctgaaa    | tggatatcgggtgctctctt | 78    |
| IRF7        | cttcagcactttcttccgaga | tgtagtgtggtgacccttgc | 25    |
| H2Q8        | cctgaggactgcacagagc   | ggccttcataggcgaactg  | 76    |
| Cxcl10      | gctgccgtcattttctgc    | tctcactggcccgtcatc   | 3     |
| Ccl5        | tgcagaggactctgagaca   | Gagtgggtgtccgagccata | 110   |



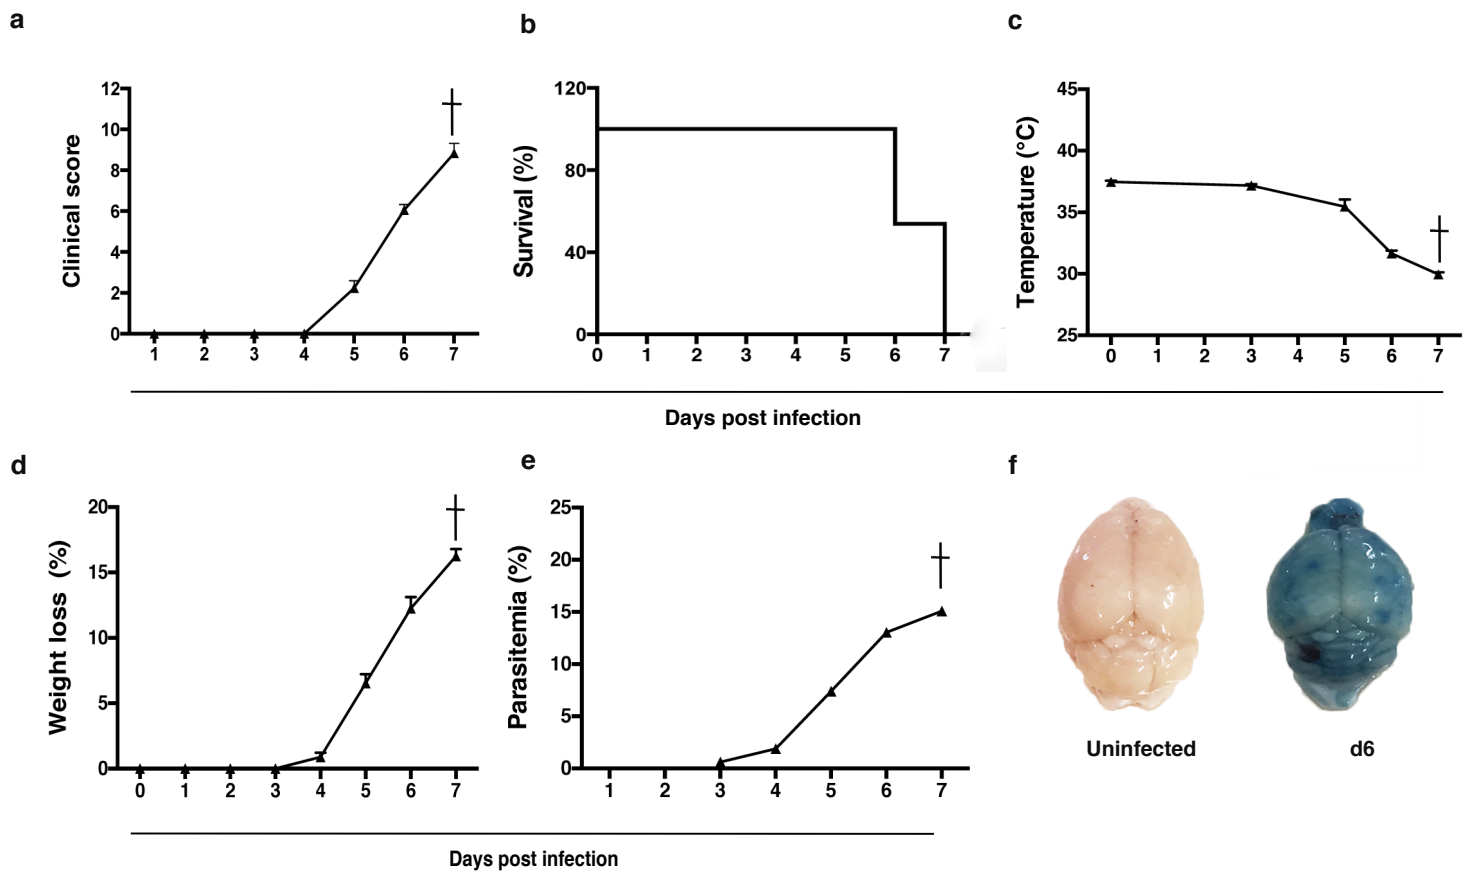

**Figure S1. Experimental Cerebral Malaria in C57BL/6 mice infected with *Plasmodium***

**berghei ANKA.** C57BL/6 mice were infected with  $10^5$  PbA infected RBCs injected ip.

(a) Clinical score of the mice was calculated as the sum of several neurological signs and

phenotypic features as described in the materials and methods; (b) Mortality (mice

reached humane endpoint when their temperature was below 31°C); (c) body temperature;

(d) body weight; (e) parasitemia as percentage of infected red blood cells (F) Representative

images of Evans blue dye extrusion analysis from PbA infected mice at day 6 post-infection.

Results in graphs A, C and D are represented as mean  $\pm$  SEM,  $n = 9$  from 3 separate

experiments. The results in graph E are represented as geometric mean.

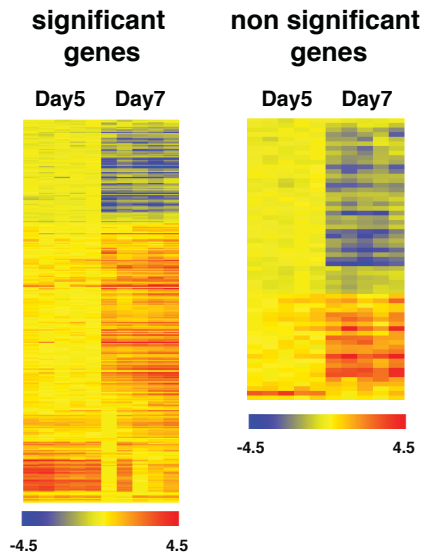

**Figure S2**

**Heatmaps representing genes differentially expressed at both, d5 and d7.**

On the left heatmap are clustered all the genes that passed the statistical analysis ( $p < 0.05$ ,  $FC > 2$ ), while on the right one are clustered genes that didn't pass the statistical analysis ( $p > 0.05$ ,  $FC > 2$ ).

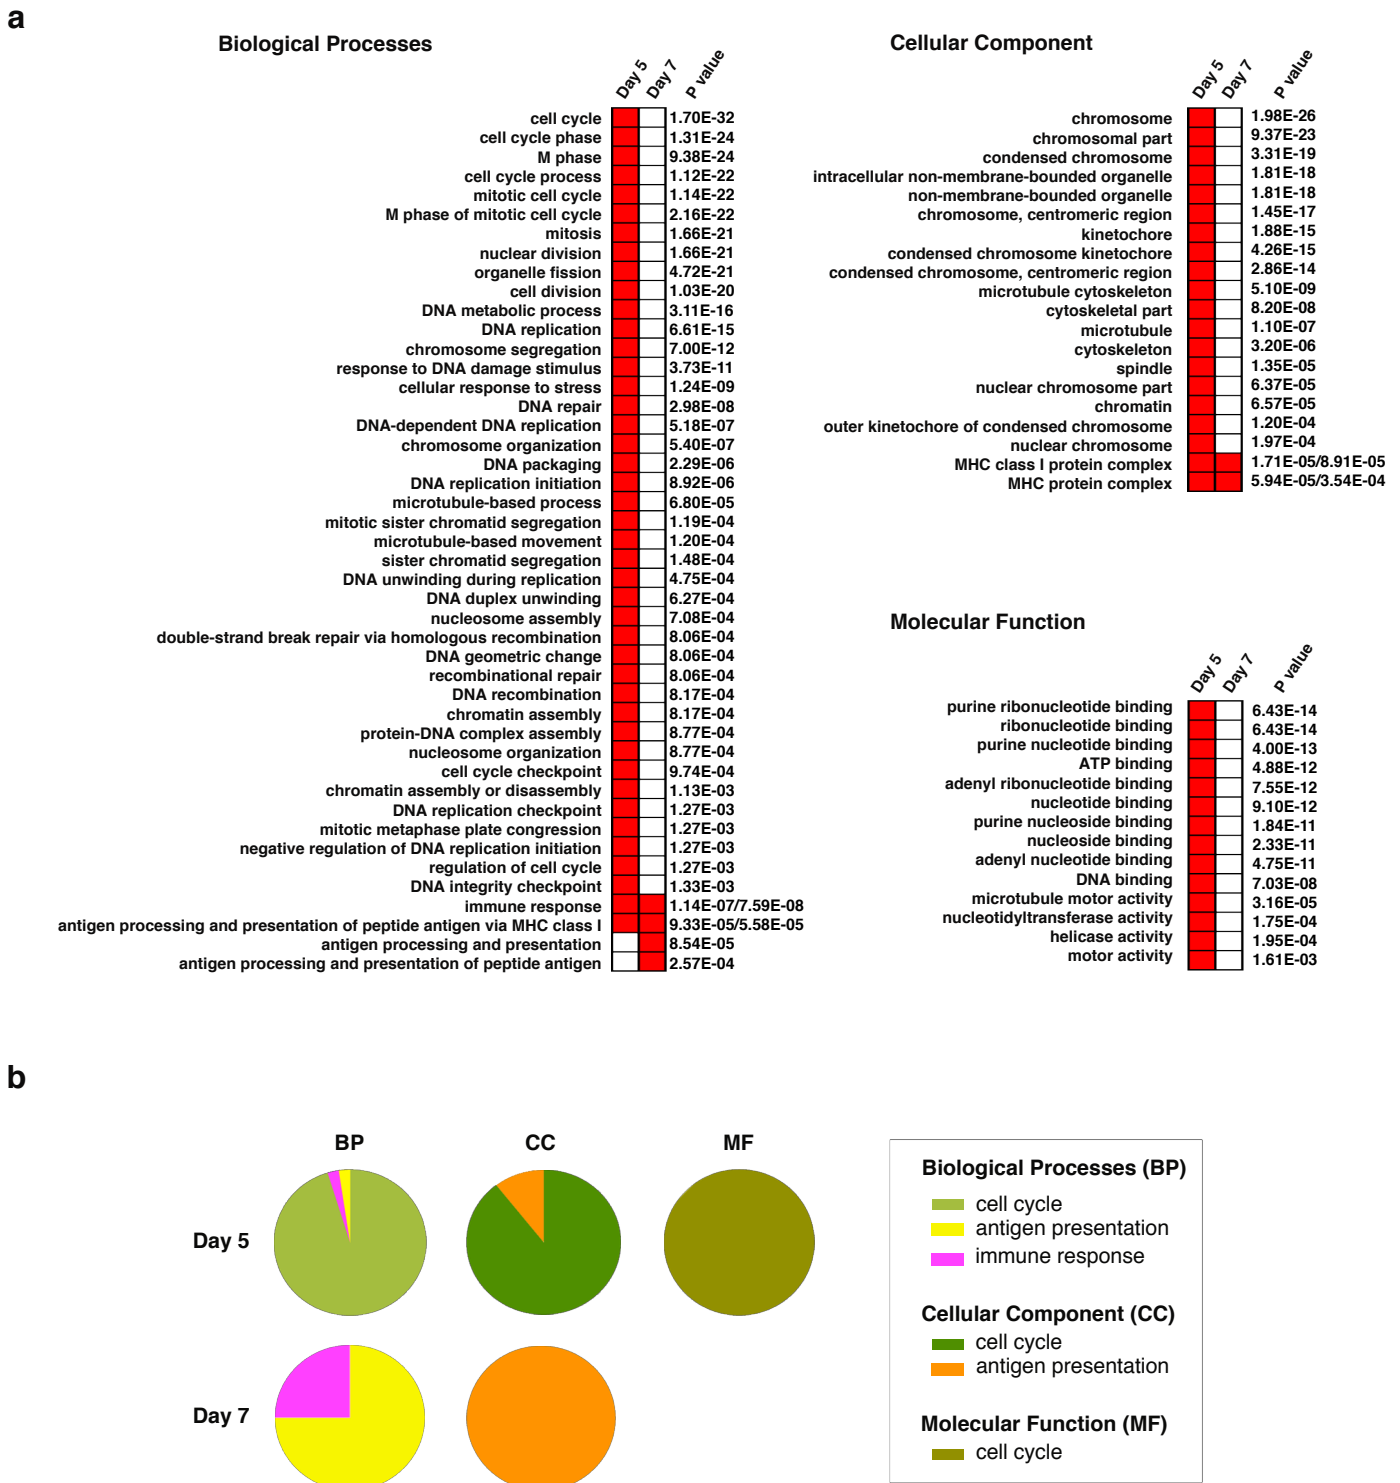

**Figure S3**  
**Gene Ontology (GO) analysis of differentially expressed genes in microglia during ECM.**  
 (a) Enriched terms (red colour) in Biological processes, Cellular Component and Molecular function using DAVID ( $p < 0.001$ ) are listed and compared between day 5 and day 7 of infection with PbA. p values for each enriched terms are reported on the side.  
 (b) Pie charts representing the distribution of the significant GO terms enriched in biological processes (BP) cellular component (CC) and molecular function (MF) at day 5 and day 7.

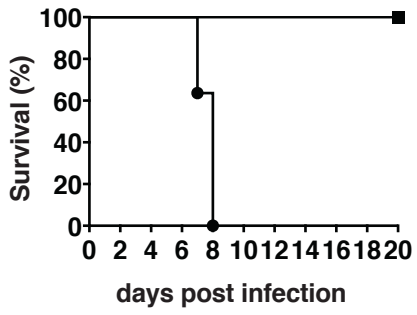

a.

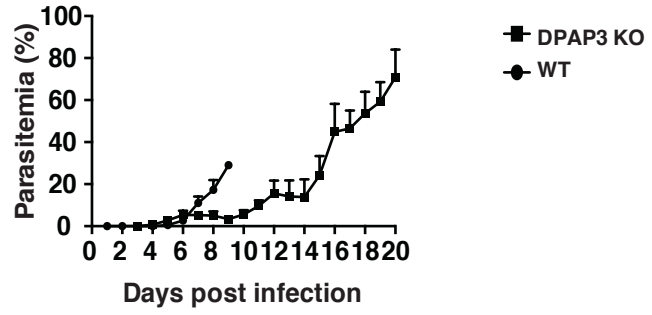

b.

Figure S4

C57BL/6 mice were infected with  $10^4$  DPAP3KO iRBC. Survival (a) and parasitemia (b) were monitored daily from d3. Results are represented as mean  $\pm$  SD, n=10.

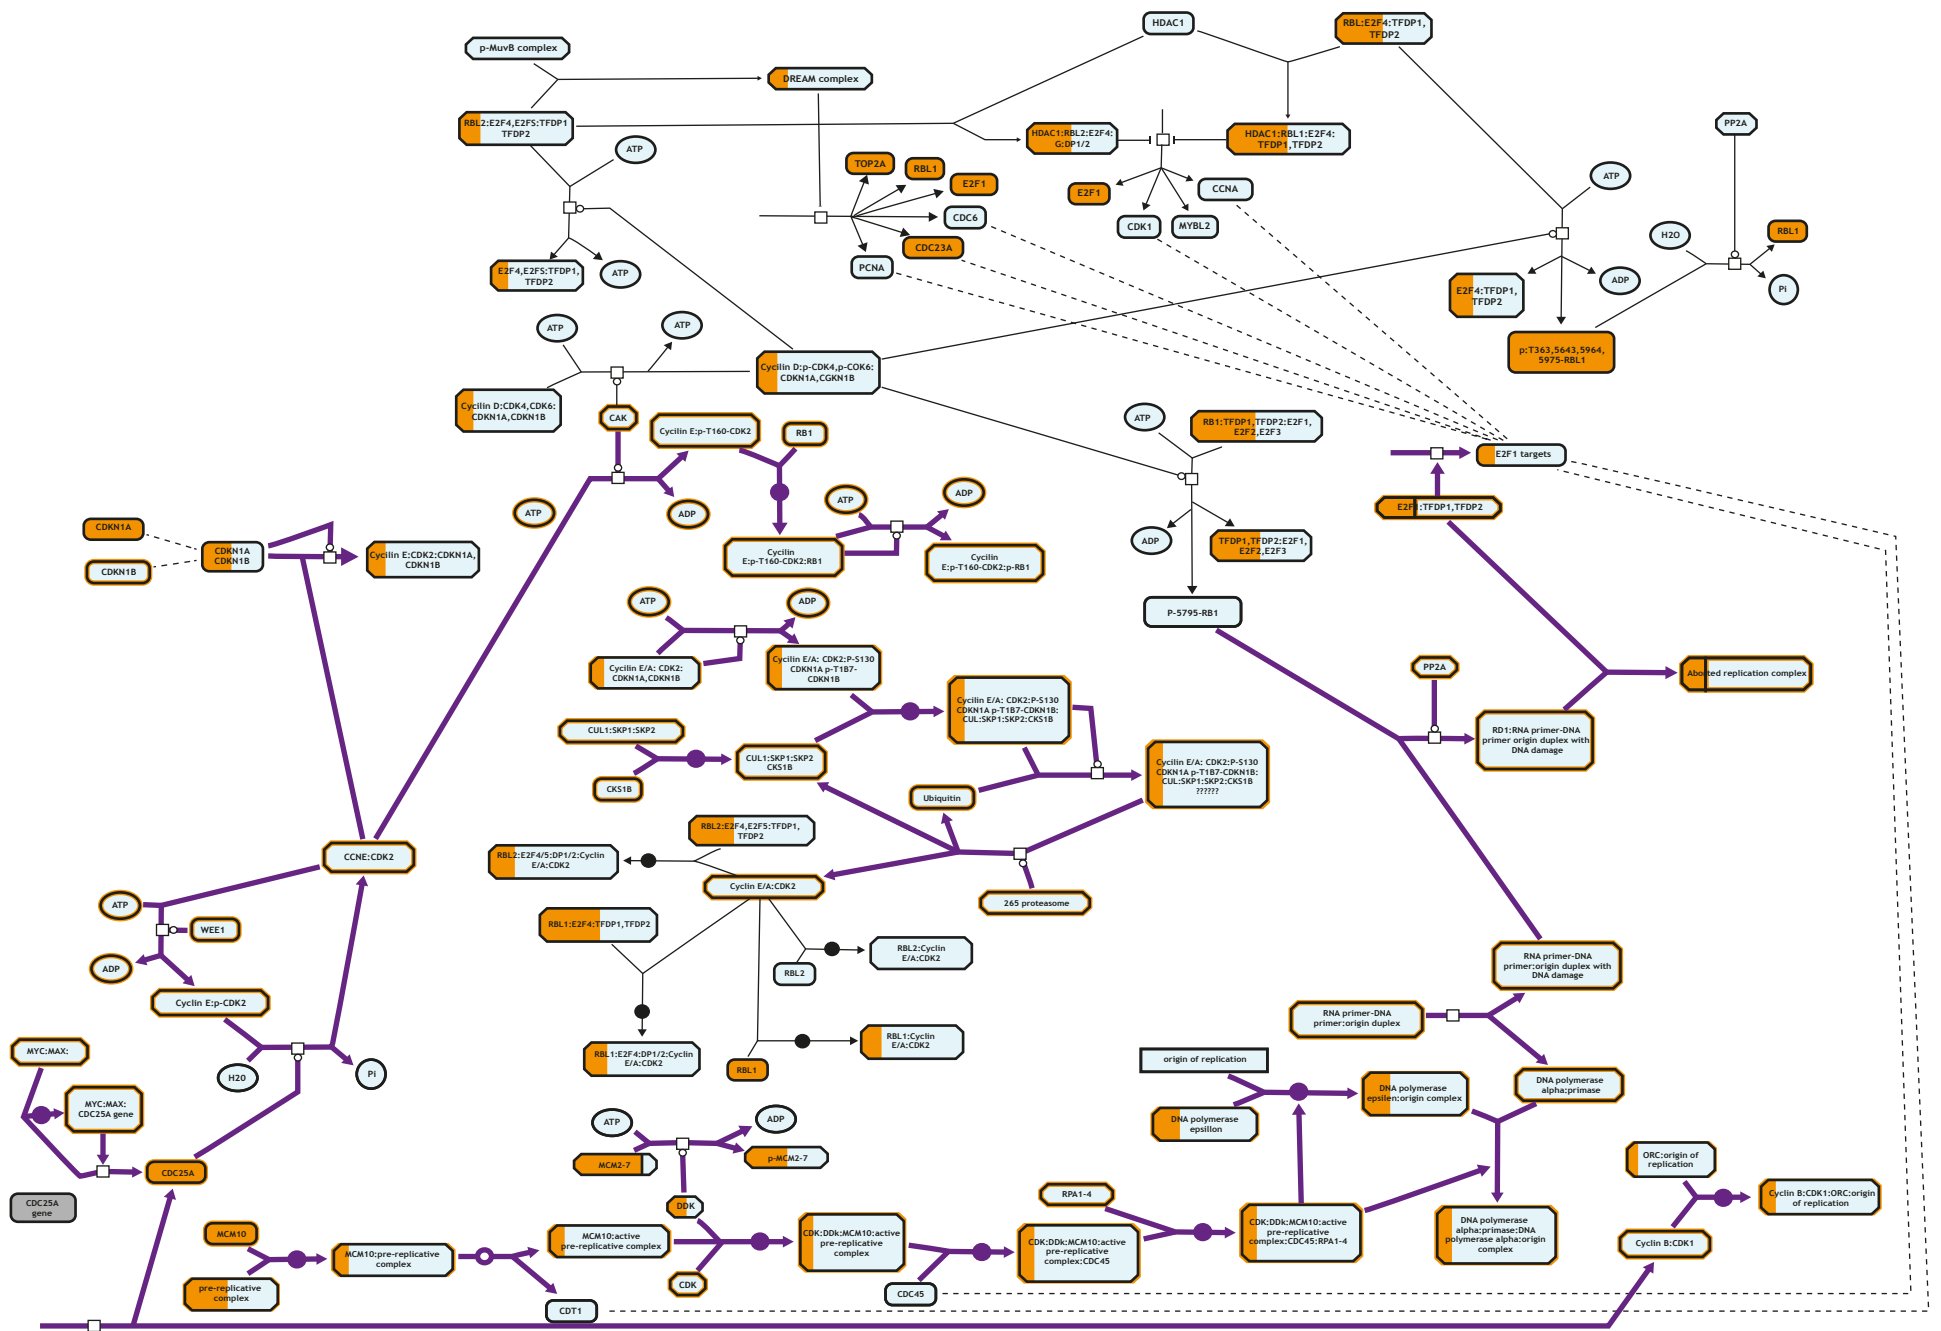

**Figure S5.** Representation of “Cell Cycle” pathway. In orange are represented all the DE transcripts at d5. Boxes containing more genes have a partial orange coloration depending on the content of DE transcripts.

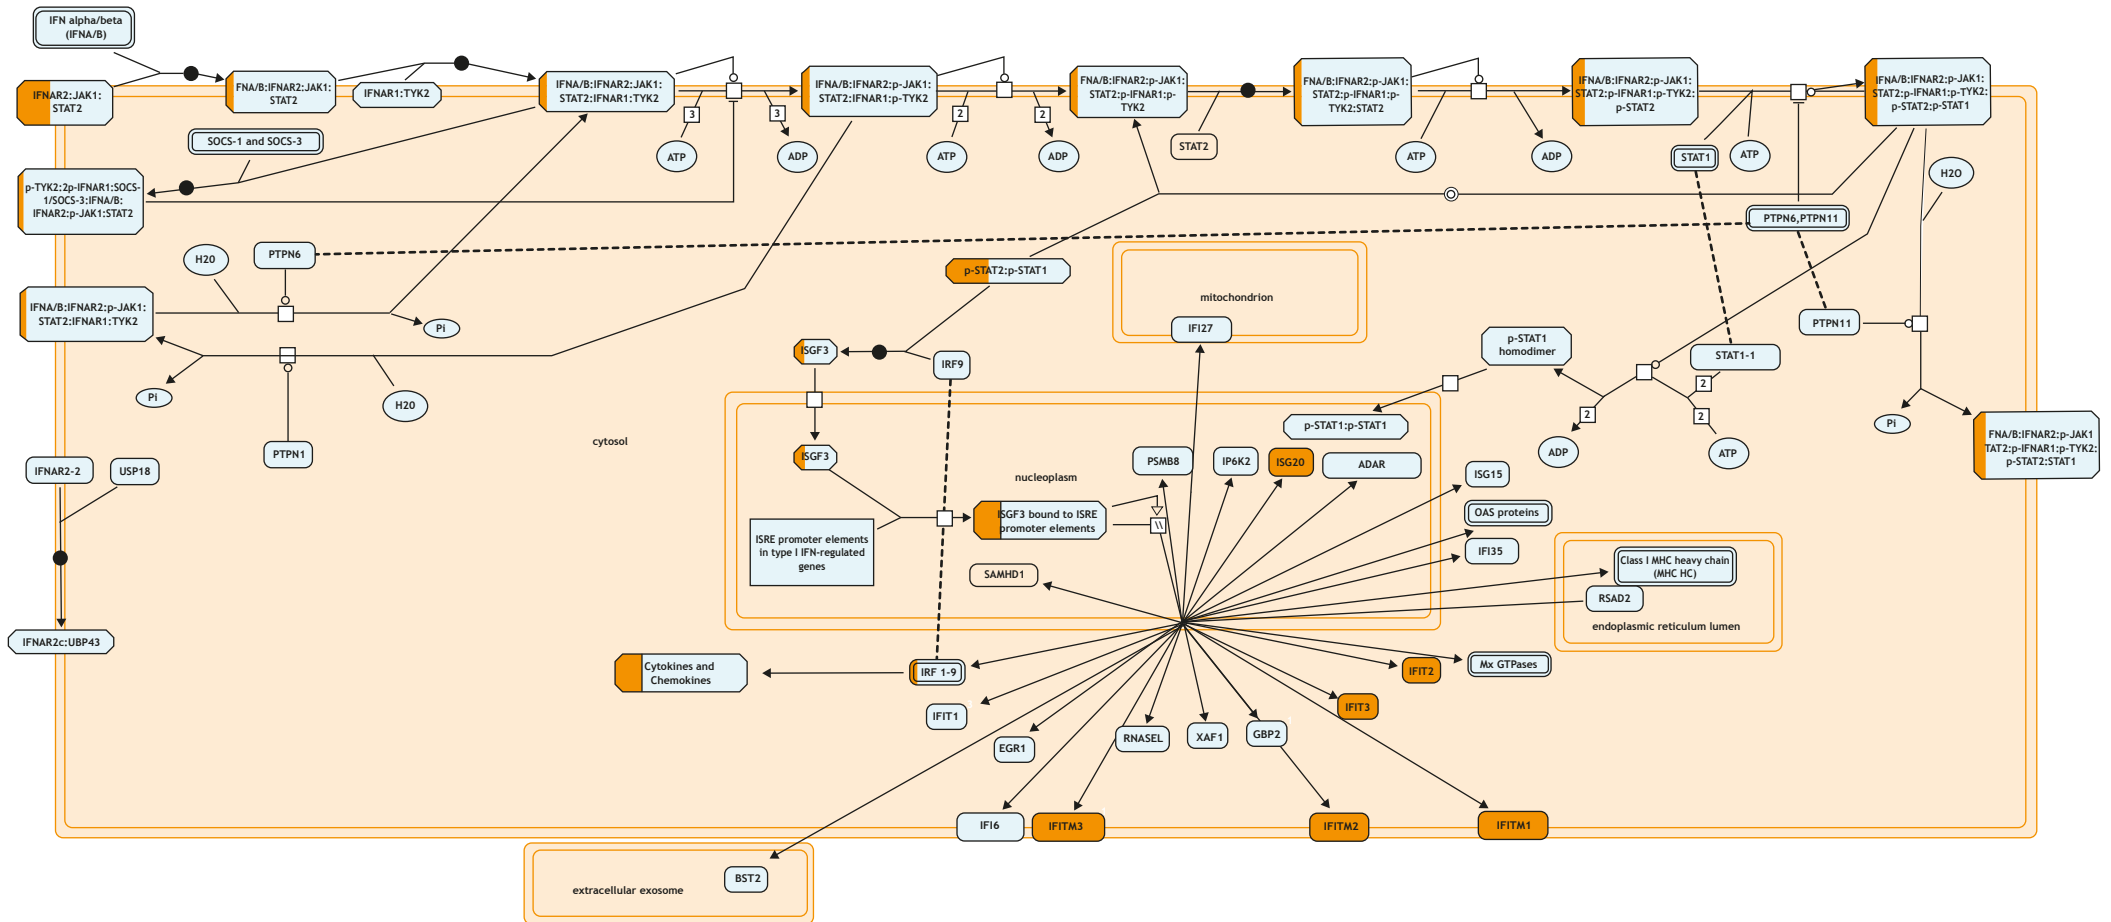

**Figure S6**

Representation of “Type I IFN” pathway. In orange are represented all the DE transcripts at d7. Boxes containing more genes have a partial orange coloration depending on the content of DE transcripts.
